# Supplementary material for: Draft genome sequence of subterranean clover, a reference for genus Trifolium
Source: PubMed Central journal article supplement (PMC4992838; doi:10.1038/srep30358), 2016-08-22
Supplement: srep30358-s1.pdf [file srep30358-s1.pdf]

## **Draft genome sequence of subterranean clover, a reference for genus *Trifolium***

Hideki Hirakawa<sup>1,6</sup>, Parwinder Kaur<sup>2,6</sup>, Kenta Shirasawa<sup>1</sup>, Phillip Nichols<sup>3,4</sup>, Soichiro

Nagano<sup>1</sup>, Rudi Appels<sup>5</sup>, William Erskine<sup>2</sup>, Sachiko N. Isobe<sup>1\*</sup>

<sup>1</sup>Kazusa DNA Research Institute, Kazusa-Kamatari 2-6-7, Kisarazu, Chiba 292-0818, Japan

<sup>2</sup>Centre for Plant Genetics and Breeding, The University of Western Australia, 35 Stirling Highway, Crawley, WA 6009, Australia

<sup>3</sup>Department of Agriculture and Food Western Australia, 3 Baron-Hay Court, South Perth, WA 6151, Australia

<sup>4</sup>School of Plant Biology, The University of Western Australia, 35 Stirling Highway, Crawley, WA 6009, Australia

<sup>5</sup>Murdoch University, 90 South Street, Murdoch, WA 6150, Australia

<sup>6</sup>Contributed equally

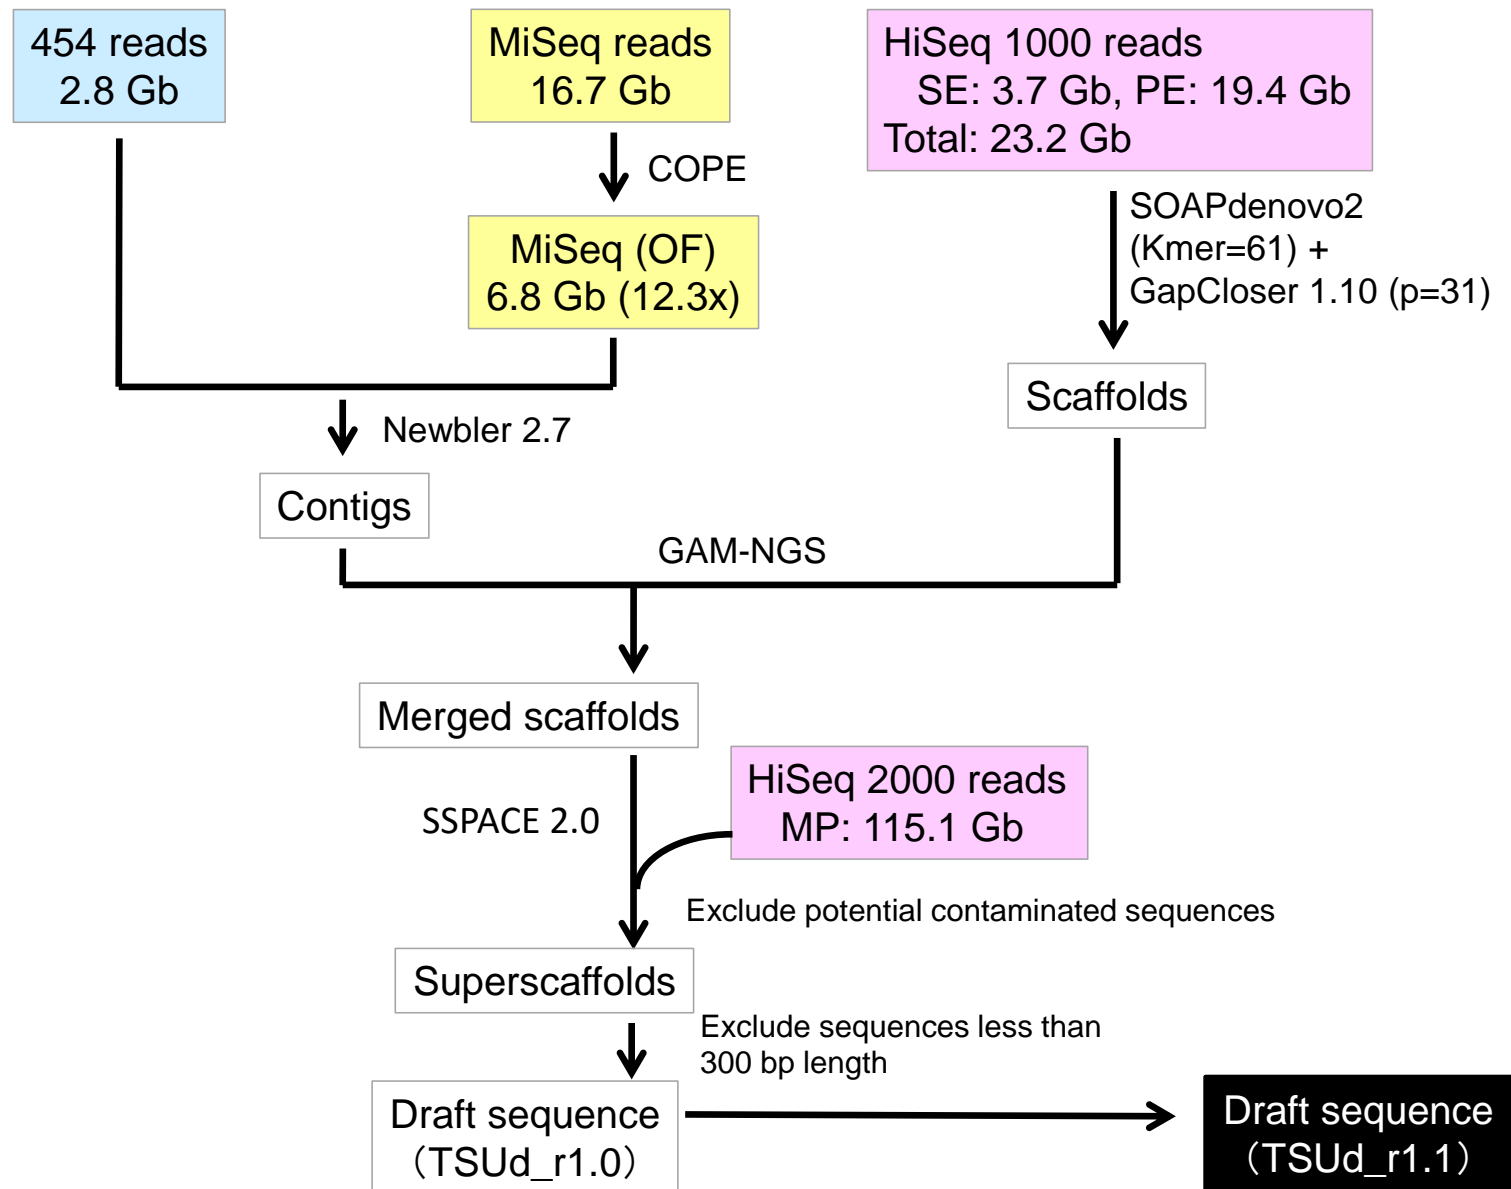

**Supplementary Fig. S1.** The strategy and status of sequencing and assembly of TSUd\_r1.1. SE, PE, OF and MP represent single-end, paired-end, overlap fragments and mate-pair reads, respectively.

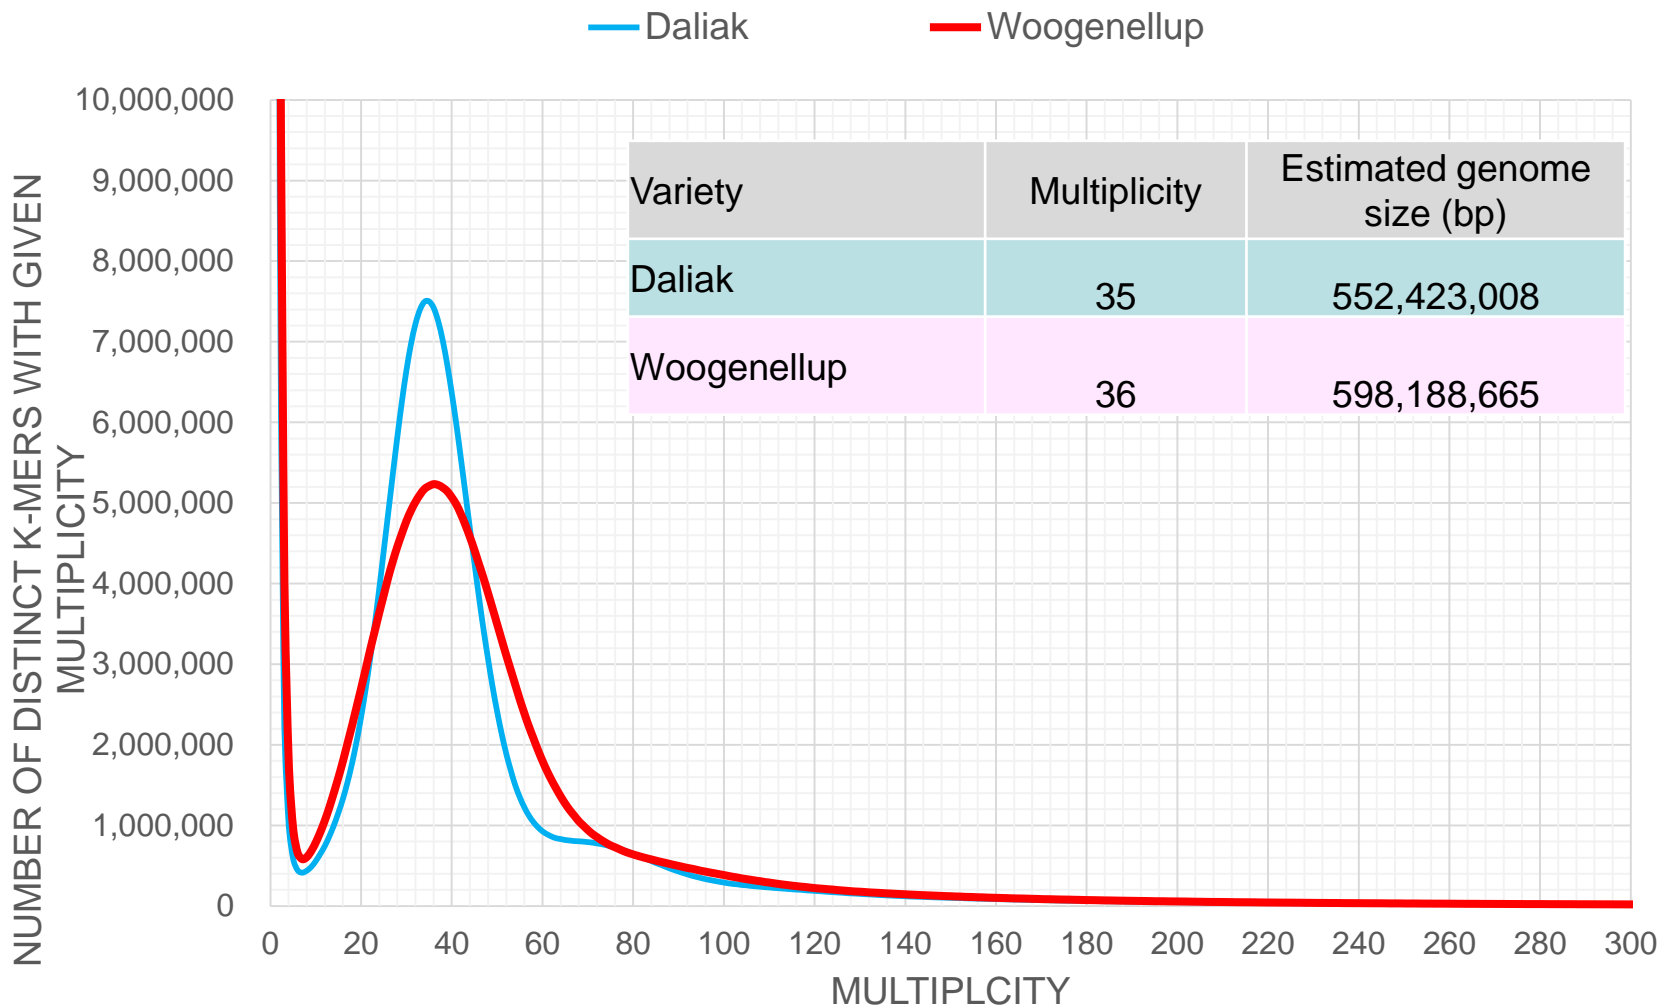

**Supplementary Fig. S2.** Genome size estimation with the distribution of the number of distinct kmers (kmer = 17) with the given multiplicity values.

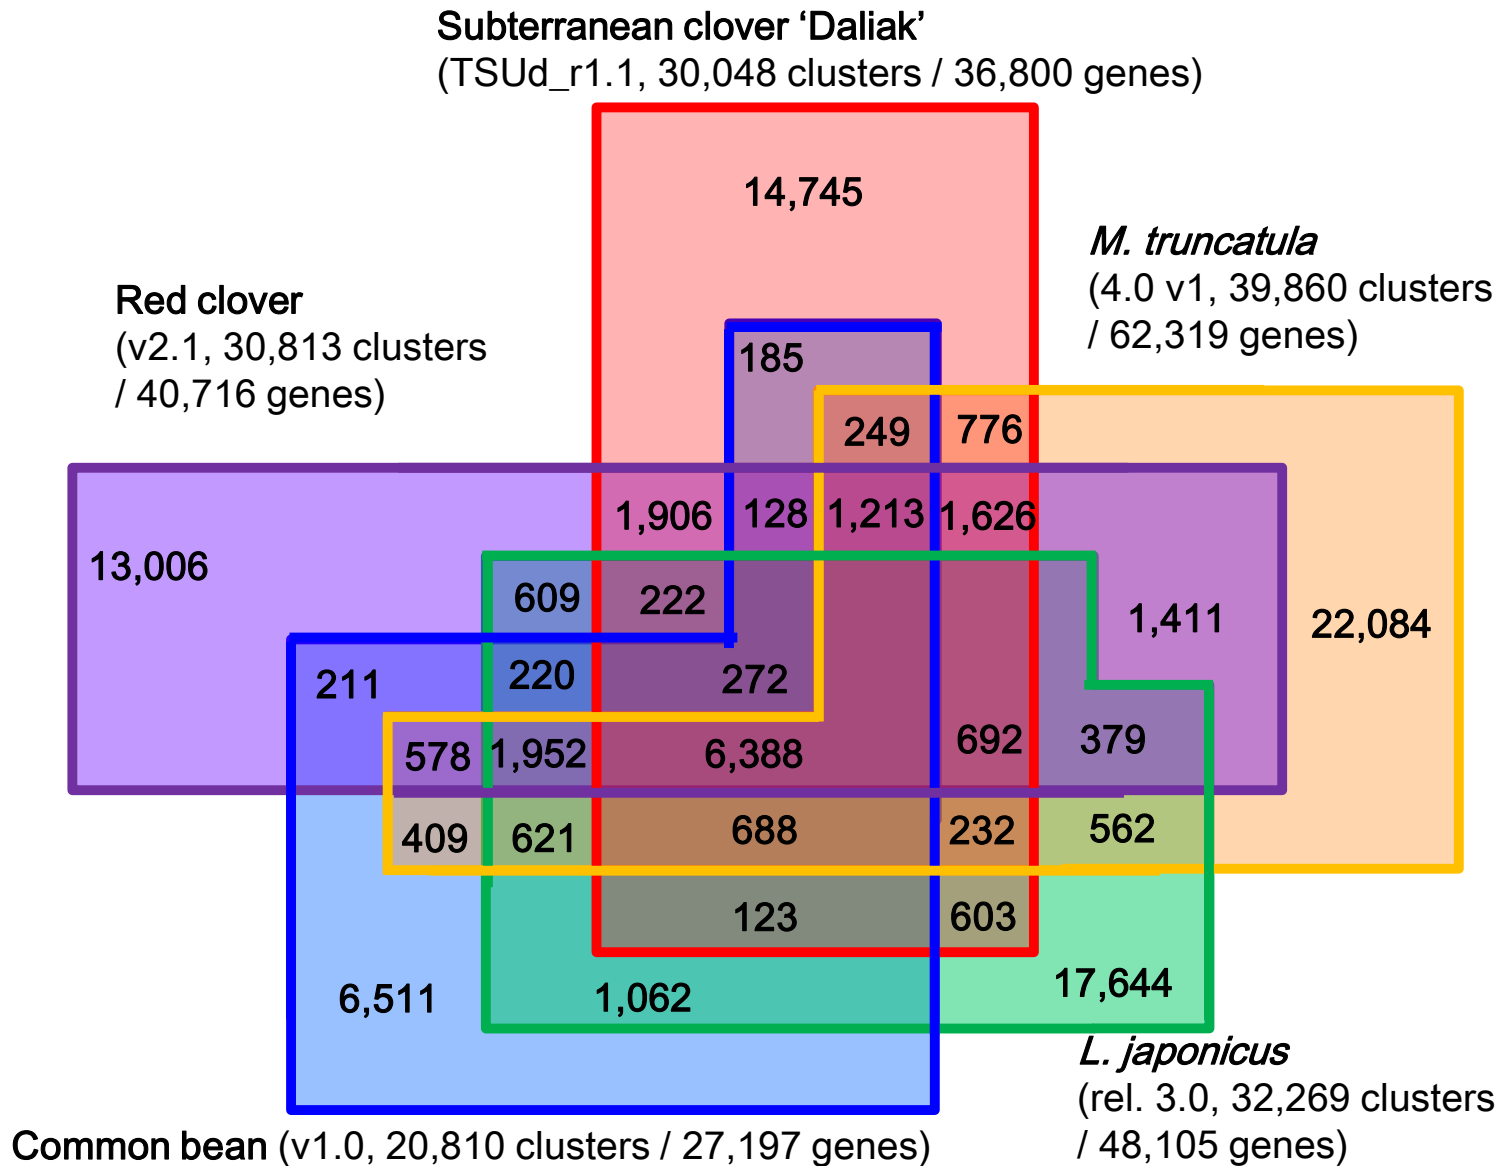

**Supplementary Fig. S3.** Venn diagram showing numbers of gene clusters in subterranean clover and the four legume species, red clover, *M. truncatula*, *L. japonicus* and common bean.

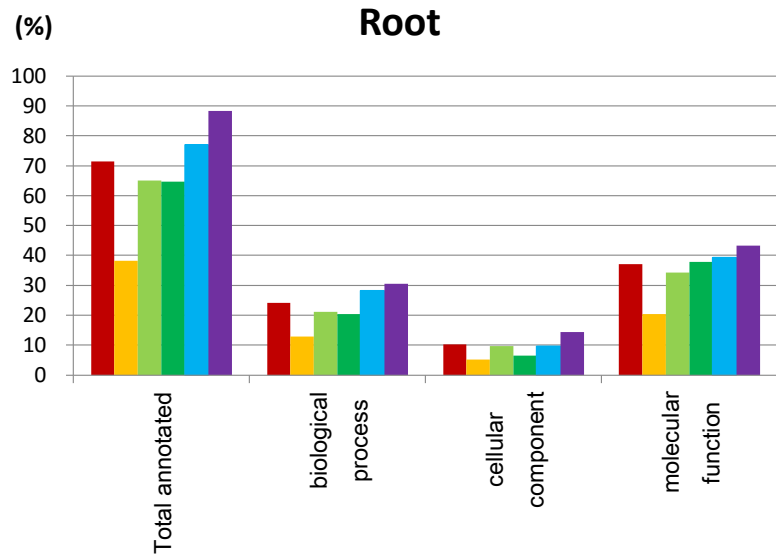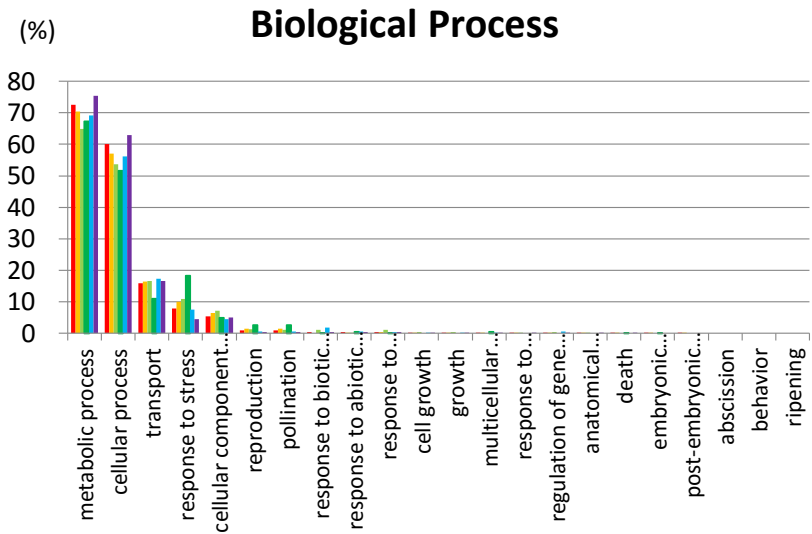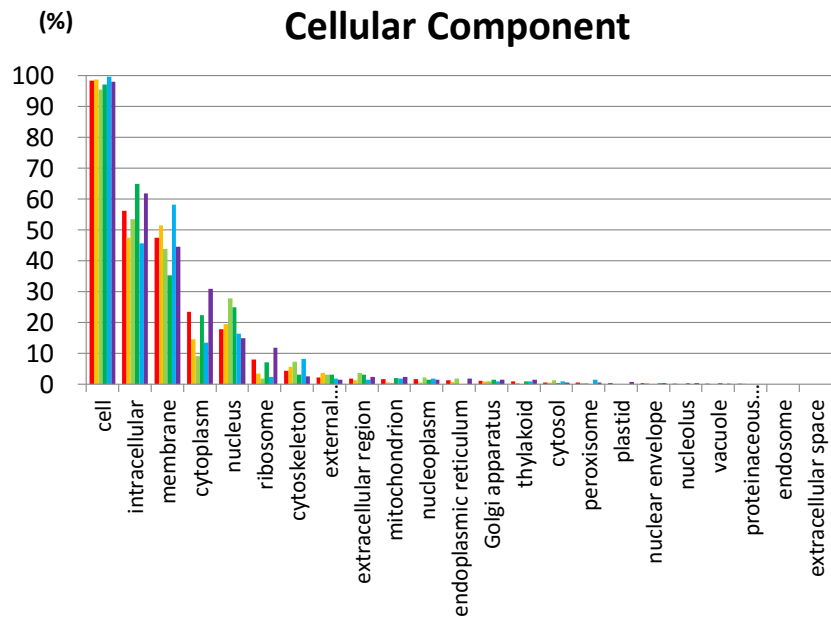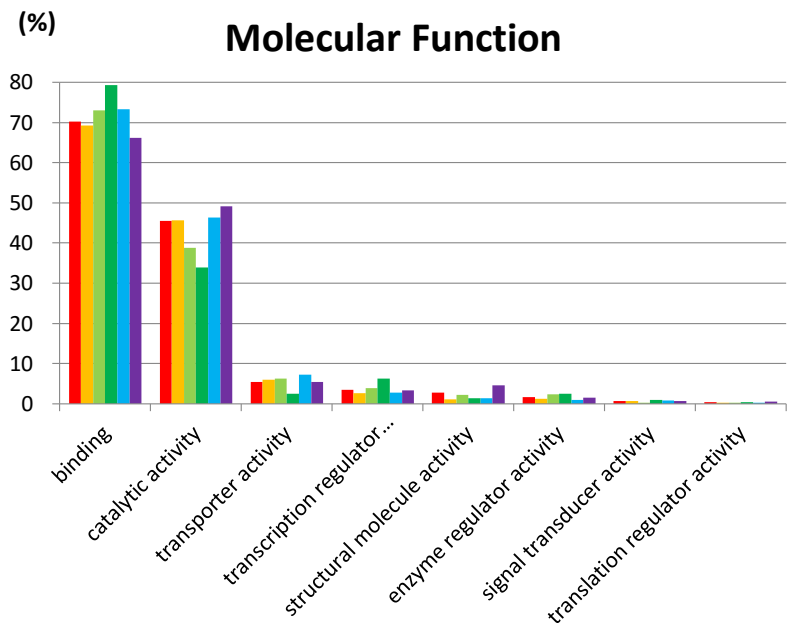

**Supplementary Fig. S4.** Classification of GO categories. Y axis represents percentages to total number of genes. Red: Tsud\_r1.1 (36,800 genes), Yellow: Subterranean clover cluster (16,995 genes), Light green: Genus *Trifolium* cluster (2,283 genes), Green: Tribe Trifolieae cluster (3,010 genes), Light blue: Hologalegina cluster (2,161 genes), Purple: Other cluster (12,351 genes). For details of the clusters, see the Figure 2 legend.

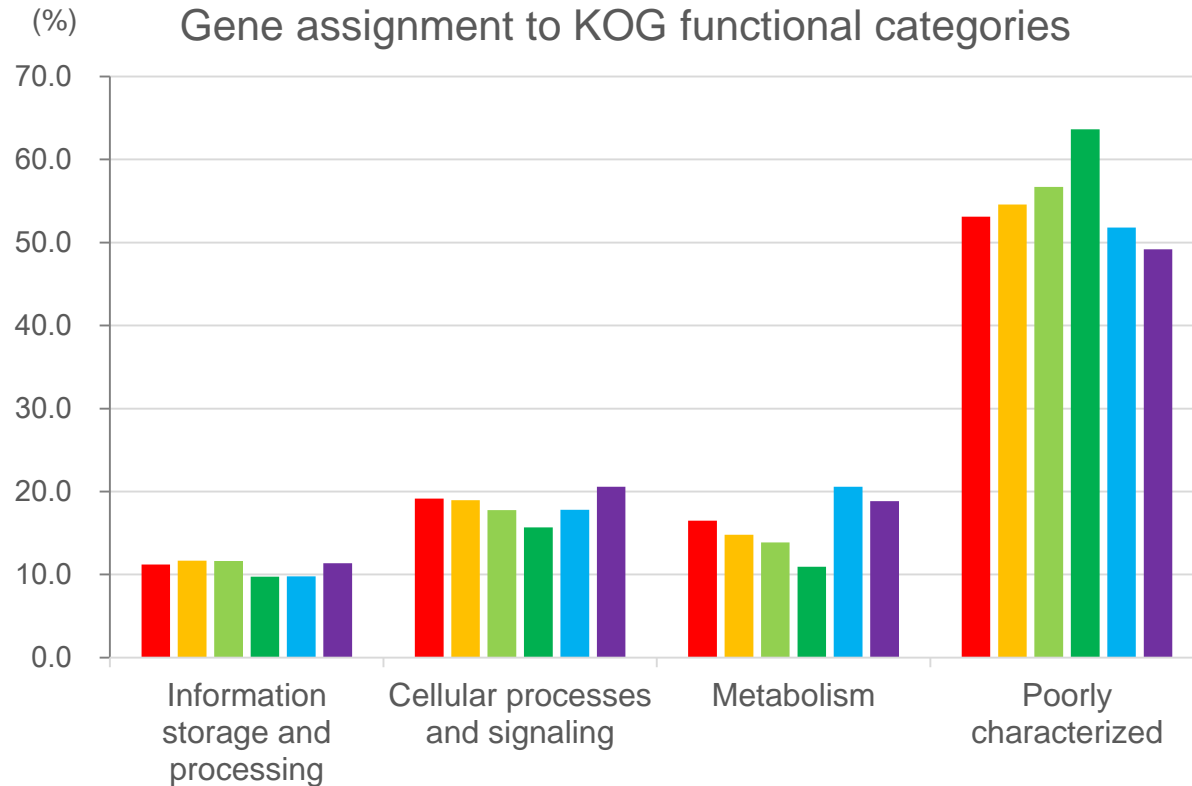

**Supplementary Fig. S5.** Gene assignment to KOG functional categories in subterranean clover. Y axis represents percentages to total number of genes. Red: Tsud\_r1.1 (31,335 genes), Yellow: Subterranean clover cluster (10,966 genes), Light green: Genus Trifolium cluster (2,123 genes), Green: tribe Trifoliae cluster (2,925 genes), Light blue: Hologalegina cluster (2,279 genes), Purple: Other cluster (13,042 genes). For details of the clusters, see the Figure 2 legend.

# Supplementary Figure S5 cont.

## Information storage and processing

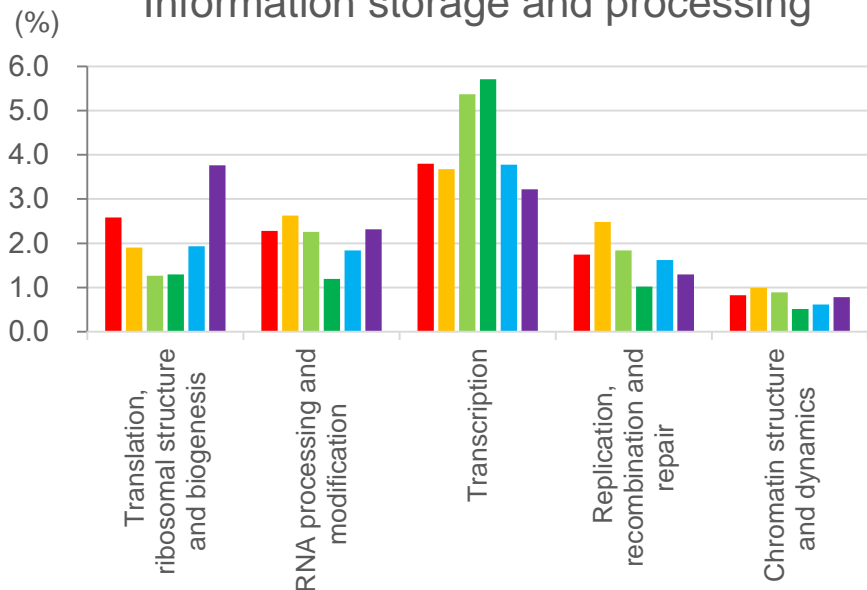

## Cellular processes and signaling

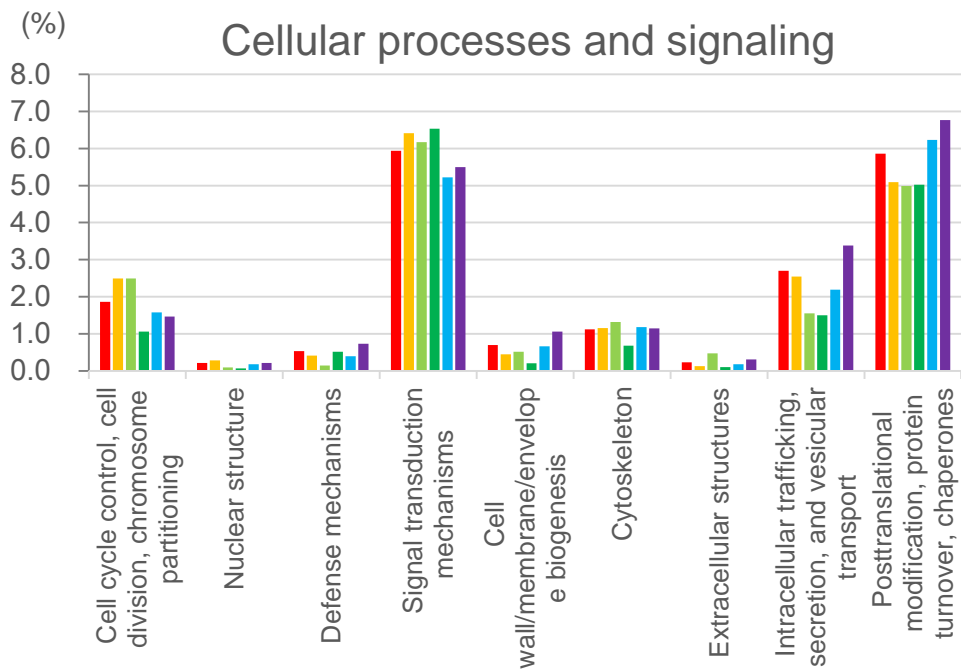

## Metabolism

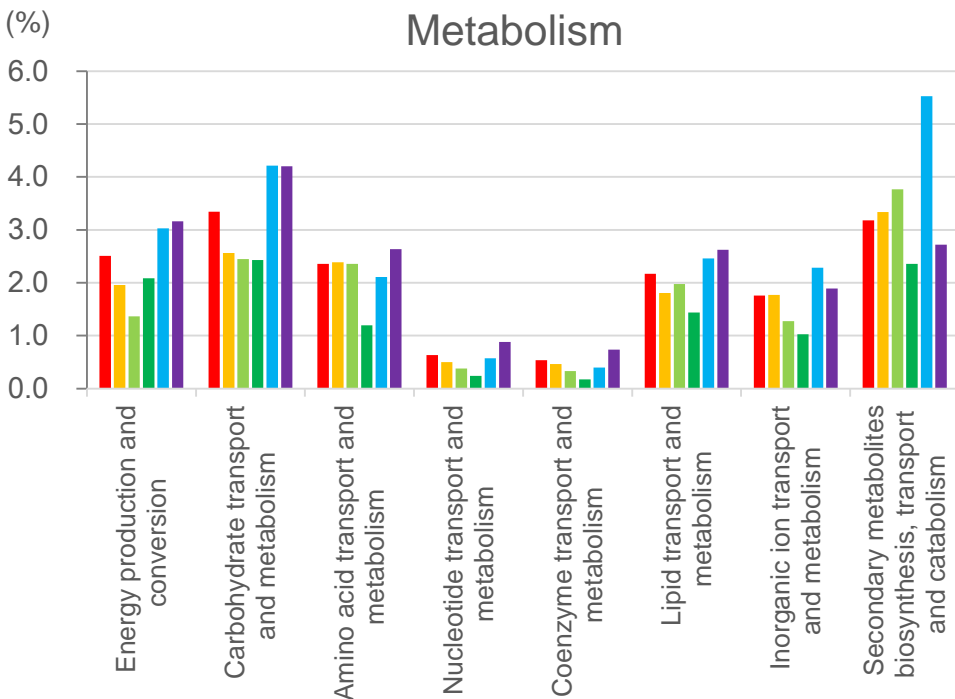

## Poorly characterized

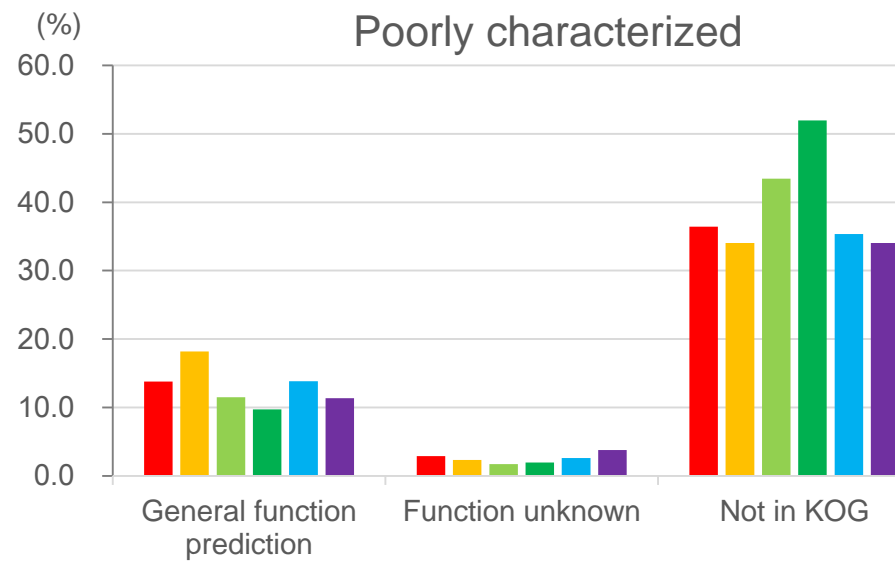

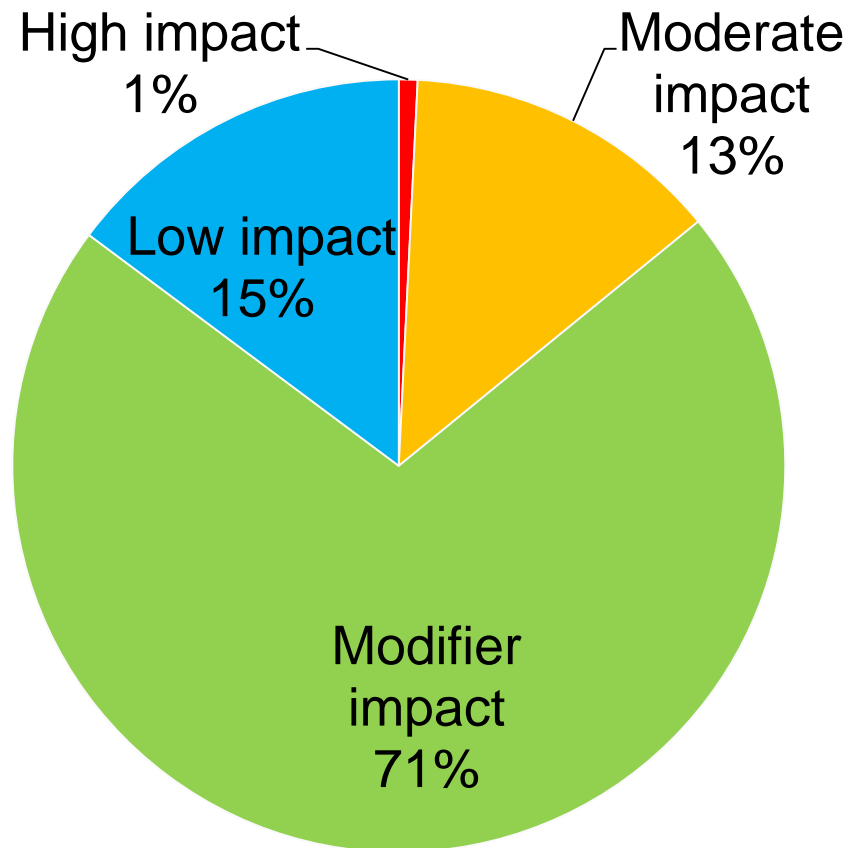

**Supplementary Fig. S6.** Effects of SNPs on gene functions that predicted by SnpEff program. Total number of the SNPs is 1,461,173.



TSUd\_r1.1 vs Lj3.0

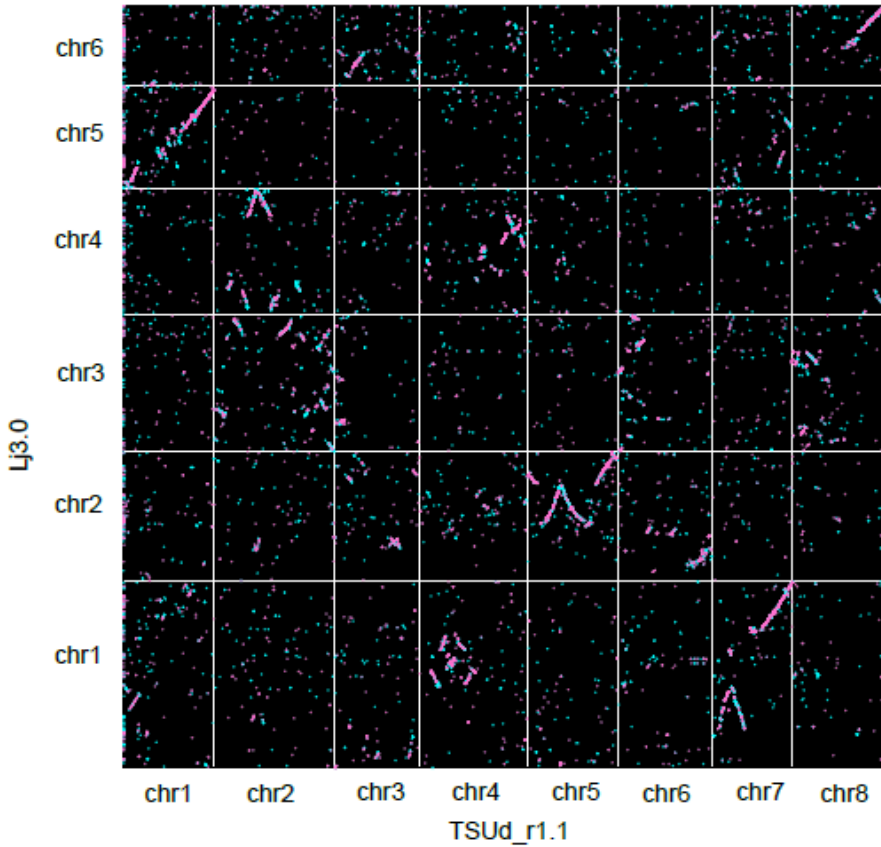

TSUd\_r1.1 vs Common bean v1.0

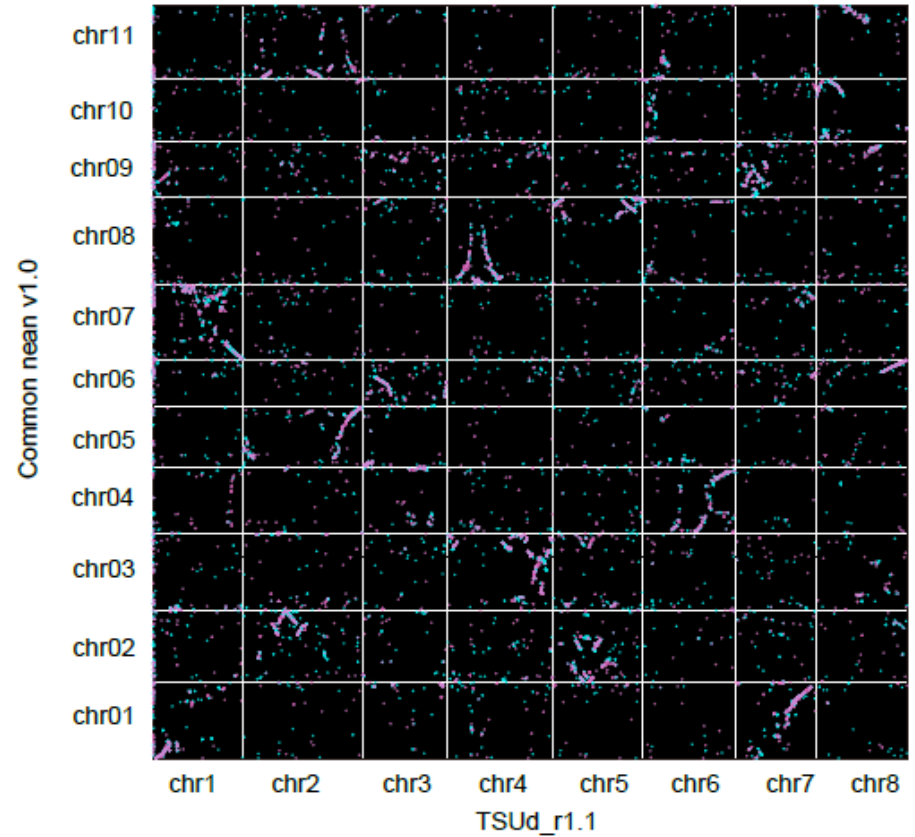

**Supplementary Fig. S7.** Graphical view of syntenic relationship between subterranean clover and *L. japonicus* (left) and subterranean clover and common bean (right). Pink and blue dots show homologous sequences of Tsud\_r1.1 with forward and revers direction against the reference sequences.

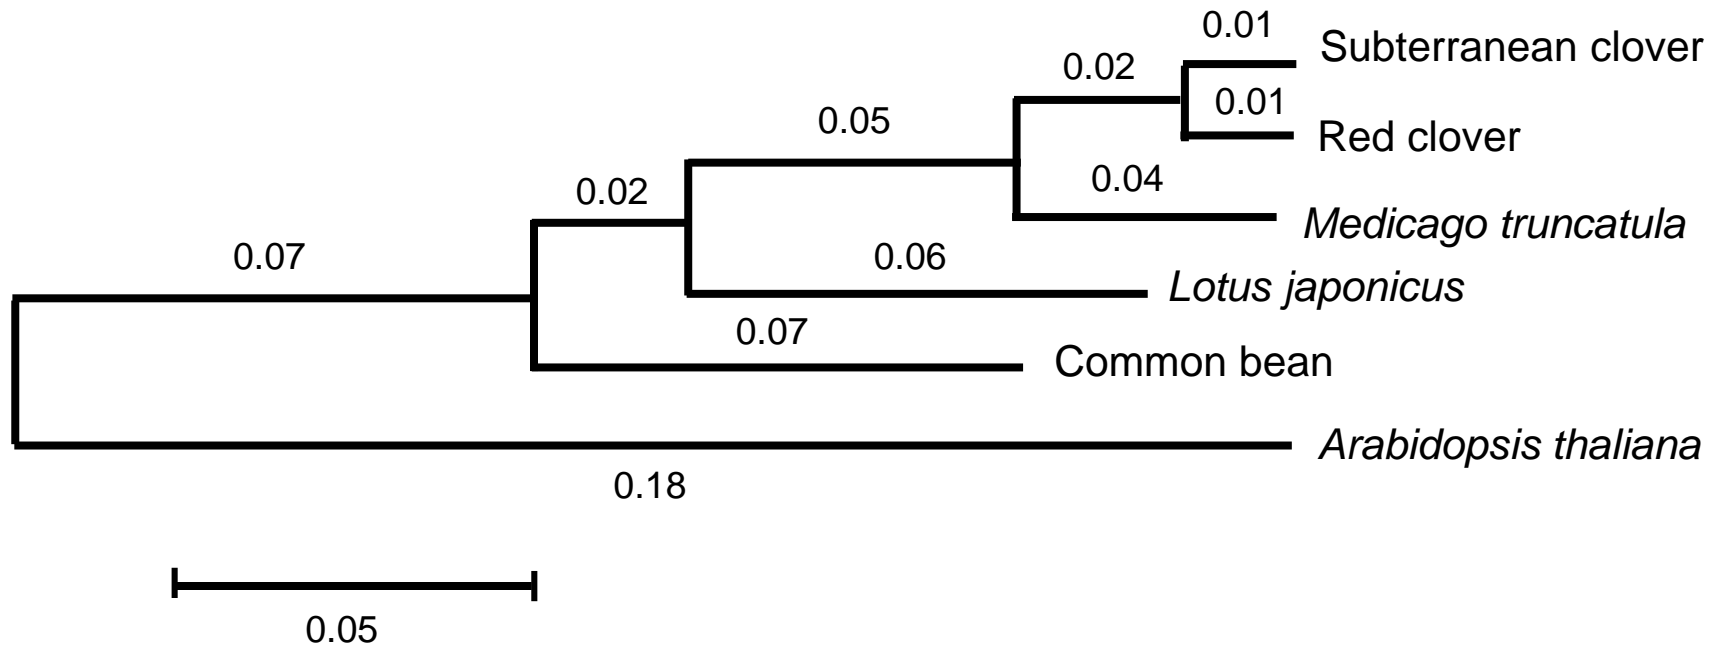

**Supplementary Fig. S8.** A phylogenetic tree of 280 common single copy genes of the five legume species and *A. thaliana* with genetic distances.

**Supplementary Table S1.** Daliak genome sequences used for *de novo* genome assembly.

| Library    | Expected insert size (kb) | Sequencing platforms | Read length (base) | Number of reads | Number of reads (after trimming) | Total bases (after trimming) | Accession # <sup>a)</sup> |
|------------|---------------------------|----------------------|--------------------|-----------------|----------------------------------|------------------------------|---------------------------|
| Single-end | -                         | Roche 454            | 506 <sup>b)</sup>  | 4,570,392       | 4,570,391                        | 2,780,976,783                | DRR032043                 |
| Single-end | -                         | Illumina Hiseq       | 97                 | 55,076,339      | 38,399,064                       | 3,724,709,208                | DRR018263                 |
| Paired-end | 270 bp                    | Illumina Hiseq       | 97                 | 238,701,300     | 200,302,236                      | 19,429,316,892               | DRR018264                 |
| Paired-end | 520 bp                    | Illumina Miseq       | 251                | 31,996,086      | 26,059,161                       | 6,540,849,411                | DRR032041                 |
| Paired-end | 660 bp                    | Illumina Miseq       | 301                | 51,929,760      | 33,863,153                       | 10,192,809,053               | DRR032042                 |
| Mate-pair  | 2Kb                       | Illumina Hiseq       | 101                | 402,871,510     | 149,780,311                      | 15,127,811,411               | DRR032035                 |
| Mate-pair  | 5Kb                       | Illumina Hiseq       | 101                | 392,809,648     | 145,132,179                      | 14,658,350,079               | DRR032036                 |
| Mate-pair  | 8Kb                       | Illumina Hiseq       | 101                | 419,466,186     | 211,575,494                      | 21,369,124,894               | DRR032037                 |
| Mate-pair  | 10Kb                      | Illumina Hiseq       | 101                | 504,962,644     | 282,278,289                      | 28,510,107,189               | DRR032038                 |
| Mate-pair  | 15Kb                      | Illumina Hiseq       | 101                | 365,114,372     | 179,556,686                      | 18,135,225,286               | DRR032039                 |
| Mate-pair  | 20Kb                      | Illumina Hiseq       | 101                | 385,504,222     | 171,238,621                      | 17,295,100,721               | DRR032040                 |

<sup>a)</sup> EXPERIMENT accession numbers registered in DDBJ Sequence Read Archive (DRA).

<sup>b)</sup> Average length

Supplemental Table S2. De novo assembly statistics.

|                       |                           | Newbler      | SOAPdenovo                      | GapCloser              | GAM-NGS                           | SSPACE(-k 3)             |                                          | Draft genome |
|-----------------------|---------------------------|--------------|---------------------------------|------------------------|-----------------------------------|--------------------------|------------------------------------------|--------------|
|                       |                           | 454+MiSeq OF | HiSeq SE and PE reads (kmer=61) | Scaffold / HiSeq reads | master=Newbler<br>slave=GapCloser | GAM-NGS / MatePair reads | Exclude potential contaminated sequences | TSUd_r1.0    |
|                       | A                         | 137,980,096  | 133,067,456                     | 141,051,289            | 138,165,060                       | 139,156,750              | 139,097,257                              | 138,029,660  |
|                       | T                         | 138,561,662  | 131,607,349                     | 139,450,166            | 138,651,800                       | 139,155,453              | 139,096,383                              | 138,029,637  |
|                       | G                         | 69,027,292   | 66,214,164                      | 70,190,930             | 69,122,335                        | 69,632,813               | 69,596,809                               | 69,027,352   |
|                       | C                         | 69,212,078   | 66,890,216                      | 70,924,618             | 69,307,980                        | 69,568,160               | 69,532,699                               | 68,962,939   |
|                       | n                         | 188          | 0                               | 0                      | 0                                 | 7,695                    | 7,695                                    | 7,695        |
|                       | N                         | 0            | 18,019,994                      | 133,296                | 5,186                             | 58,186,325               | 58,176,630                               | 58,176,614   |
|                       | others                    | 0            | 0                               | 0                      | 0                                 | 0                        | 0                                        | 0            |
|                       | Total                     | 414,781,316  | 415,799,179                     | 421,750,299            | 415,252,361                       | 475,707,196              | 475,507,473                              | 472,233,897  |
|                       | GC%                       | 33.30%       | 32.00%                          | 33.50%                 | 33.30%                            | 29.30%                   | 29.30%                                   | 29.20%       |
|                       | Total(ACGT)               | 414,781,128  | 397,779,185                     | 421,617,003            | 415,247,175                       | 417,513,176              | 417,323,148                              | 414,049,588  |
|                       | GC%(ACGT)                 | 33.30%       | 33.50%                          | 33.50%                 | 33.30%                            | 33.30%                   | 33.30%                                   | 33.30%       |
|                       | Number of contigs         | 101,010      | 603,937                         | 603,937                | 92,279                            | 44,900                   | 44,332                                   | 27,228       |
|                       | Total length of contigs   | 414,781,316  | 415,799,179                     | 421,750,299            | 415,252,361                       | 475,707,196              | 475,507,473                              | 472,233,897  |
|                       | Average length of contigs | 4,106        | 688                             | 698                    | 4,499                             | 10,594                   | 10,726                                   | 17,343       |
| Max length of contigs | 167,045                   | 81,505       | 82,275                          | 216,636                | 4,704,020                         | 4,704,020                | 4,704,020                                |              |
| Min length of contigs | 100                       | 100          | 100                             | 100                    | 100                               | 100                      | 300                                      |              |
| N50 length            | 13,363                    | 6,388        | 6,380                           | 17,057                 | 319,420                           | 319,420                  | 322,970                                  |              |
| 100bp>=               | Number of contigs         | 101,010      | 603,937                         | 603,937                | 92,279                            | 44,900                   | 44,332                                   | 27,228       |
|                       | Total length of contigs   | 414,781,316  | 415,799,179                     | 421,750,299            | 415,252,361                       | 475,707,196              | 475,507,473                              | 472,233,897  |
|                       | Average length of contigs | 4,106        | 688                             | 698                    | 4,499                             | 10,594                   | 10,726                                   | 17,343       |
| 150bp>=               | Number of contigs         | 94,334       | 190,095                         | 190,095                | 85,613                            | 39,935                   | 39,468                                   | 27,228       |
|                       | Total length of contigs   | 413,957,879  | 366,283,325                     | 372,234,445            | 414,430,175                       | 475,090,236              | 474,903,107                              | 472,233,897  |
|                       | Average length of contigs | 4,388        | 1,926                           | 1,958                  | 4,840                             | 11,896                   | 12,032                                   | 17,343       |
| 200bp>=               | Number of contigs         | 89,127       | 141,408                         | 141,400                | 80,431                            | 35,079                   | 34,707                                   | 27,228       |
|                       | Total length of contigs   | 413,054,710  | 357,953,677                     | 363,903,292            | 413,531,396                       | 474,244,796              | 474,074,206                              | 472,233,897  |
|                       | Average length of contigs | 4,634        | 2,531                           | 2,573                  | 5,141                             | 13,519                   | 13,659                                   | 17,343       |
| 300bp>=               | Number of contigs         | 81,366       | 114,086                         | 113,350                | 72,775                            | 27,446                   | 27,228                                   | 27,228       |
|                       | Total length of contigs   | 411,140,963  | 351,432,544                     | 357,200,390            | 411,644,576                       | 472,366,715              | 472,233,897                              | 472,233,897  |
|                       | Average length of contigs | 5,052        | 3,080                           | 3,151                  | 5,656                             | 17,210                   | 17,343                                   | 17,343       |
| 400bp>=               | Number of contigs         | 75,670       | 94,754                          | 97,587                 | 67,279                            | 22,128                   | 21,983                                   | 21,983       |
|                       | Total length of contigs   | 409,161,689  | 344,766,029                     | 351,753,101            | 409,735,552                       | 470,523,968              | 470,416,422                              | 470,416,422  |
|                       | Average length of contigs | 5,407        | 3,638                           | 3,604                  | 6,090                             | 21,263                   | 21,399                                   | 21,399       |
| 500bp>=               | Number of contigs         | 70,852       | 85,034                          | 87,352                 | 62,742                            | 17,948                   | 17,857                                   | 17,857       |
|                       | Total length of contigs   | 407,001,667  | 340,413,831                     | 347,177,142            | 407,701,559                       | 468,655,431              | 468,572,183                              | 468,572,183  |
|                       | Average length of contigs | 5,744        | 4,003                           | 3,974                  | 6,498                             | 26,111                   | 26,240                                   | 26,240       |
| 1Kbp>=                | Number of contigs         | 54,878       | 58,414                          | 60,214                 | 48,129                            | 7,806                    | 7,788                                    | 7,788        |
|                       | Total length of contigs   | 395,472,153  | 321,677,828                     | 327,966,600            | 397,180,582                       | 461,600,733              | 461,565,830                              | 461,565,830  |
|                       | Average length of contigs | 7,206        | 5,506                           | 5,446                  | 8,252                             | 59,134                   | 59,266                                   | 59,266       |
| 2Kbp>=                | Number of contigs         | 39,179       | 39,675                          | 40,489                 | 34,360                            | 4,374                    | 4,369                                    | 4,369        |
|                       | Total length of contigs   | 372,929,356  | 295,179,563                     | 300,055,418            | 377,470,839                       | 457,128,422              | 457,109,265                              | 457,109,265  |
|                       | Average length of contigs | 9,518        | 7,439                           | 7,410                  | 10,985                            | 104,510                  | 104,625                                  | 104,625      |
| 3Kbp>=                | Number of contigs         | 30,768       | 30,610                          | 31,097                 | 27,224                            | 3,745                    | 3,742                                    | 3,742        |
|                       | Total length of contigs   | 352,314,739  | 272,906,771                     | 276,973,937            | 360,009,073                       | 455,593,178              | 455,578,584                              | 455,578,584  |
|                       | Average length of contigs | 11,450       | 8,915                           | 8,906                  | 13,223                            | 121,653                  | 121,747                                  | 121,747      |
| 4Kbp>=                | Number of contigs         | 25,298       | 24,742                          | 25,118                 | 22,691                            | 3,495                    | 3,492                                    | 3,492        |
|                       | Total length of contigs   | 333,365,833  | 252,573,260                     | 256,253,300            | 344,312,038                       | 454,744,070              | 454,729,476                              | 454,729,476  |
|                       | Average length of contigs | 13,177       | 10,208                          | 10,201                 | 15,173                            | 130,112                  | 130,220                                  | 130,220      |
| 5Kbp>=                | Number of contigs         | 21,375       | 20,422                          | 20,700                 | 19,437                            | 3,373                    | 3,372                                    | 3,372        |
|                       | Total length of contigs   | 315,830,075  | 233,241,931                     | 236,505,632            | 329,781,284                       | 454,201,577              | 454,196,068                              | 454,196,068  |
|                       | Average length of contigs | 14,775       | 11,421                          | 11,425                 | 16,966                            | 134,658                  | 134,696                                  | 134,696      |

**Supplementary Table S3.** Statistics of a SNP linkage map and numbers of anchored scaffolds.

|       | Linkage map           |                |             |                                 |                                 | Number of anchored scaffolds (TSUd_r1.1). |
|-------|-----------------------|----------------|-------------|---------------------------------|---------------------------------|-------------------------------------------|
|       | Number of mapped SNPs | Number of Bins | Length (cM) | Mean distance between SNPs (cM) | Mean distance between bins (cM) |                                           |
| Chr1  | 2929                  | 240            | 243.9       | 0.083                           | 1.02                            | 152                                       |
| Chr2  | 6281                  | 330            | 301.8       | 0.048                           | 0.91                            | 266                                       |
| Chr3  | 3306                  | 291            | 282.8       | 0.086                           | 0.97                            | 217                                       |
| Chr4  | 6439                  | 303            | 269.0       | 0.042                           | 0.89                            | 250                                       |
| Chr5  | 4888                  | 268            | 255.9       | 0.052                           | 0.95                            | 215                                       |
| Chr6  | 3886                  | 258            | 270.6       | 0.070                           | 1.05                            | 240                                       |
| Chr7  | 3775                  | 221            | 217.0       | 0.057                           | 0.98                            | 134                                       |
| Chr8  | 3897                  | 242            | 243.1       | 0.062                           | 1.00                            | 228                                       |
| Total | 35,341                | 2,153          | 2,084       | 0.059                           | 0.97                            | 1,702                                     |

**Supplementary Table S4.** Assembly statistics of TSUd\_r1.1 and pseudomolecules.

|                                            | TSUd_r1.1   | TSUd_pseudo<br>mol<br>Chr1-8 | TSUd_r1.1_ps<br>eudomolecule.<br>fasta<br>(Chr1~8 +<br>scaffold) | TSUw_r1.0 <sup>a)</sup> |
|--------------------------------------------|-------------|------------------------------|------------------------------------------------------------------|-------------------------|
| A                                          | 138,019,896 | 115,916,616                  | 138,022,334                                                      | 22,103,280              |
| T                                          | 138,039,401 | 115,951,722                  | 138,036,963                                                      | 22,087,679              |
| G                                          | 69,026,825  | 57,228,356                   | 69,026,313                                                       | 11,798,469              |
| C                                          | 68,963,466  | 57,157,876                   | 68,963,978                                                       | 11,805,590              |
| n                                          | 7,695       | 6,246                        | 7,695                                                            | 1,449                   |
| N                                          | 57,776,905  | 54,887,320                   | 74,716,905                                                       | 19,829,585              |
| others                                     | 0           | 0                            | 0                                                                | 0                       |
| Total                                      | 471,834,188 | 401,148,136                  | 488,774,188                                                      | 87,626,052              |
| Total (ATGC)                               | 414,049,588 | 346,254,570                  | 414,049,588                                                      | 67,795,018              |
| GC% (ATGC)                                 | 33.3        | 33.0                         | 33.3                                                             | 34.8                    |
| Number of<br>sequences                     | 27,424      | 8                            | 25,730                                                           | 25,722                  |
| Total length of<br>sequences (bp)          | 471,834,188 | 401,148,136                  | 488,774,188                                                      | 87,626,052              |
| Numbers of included<br>TSUd_r1.1 scaffolds | -           | -                            | -                                                                | 25,722                  |
| gap (N10000)                               | -           | -                            | -                                                                | -                       |
| Scaffolds length                           | -           | -                            | -                                                                | -                       |

|                                            | Tsud_chr1  | Tsud_chr2  | Tsud_chr3  | Tsud_chr4  | Tsud_chr5  | Tsud_chr6  | Tsud_chr7  | Tsud_chr8  | Chr0       | TSUw_r1.0 <sup>a)</sup> |
|--------------------------------------------|------------|------------|------------|------------|------------|------------|------------|------------|------------|-------------------------|
| A                                          | 14,250,573 | 18,446,754 | 12,584,179 | 16,429,415 | 13,794,029 | 13,858,257 | 12,790,090 | 13,763,319 | 22,103,280 | 22,103,280              |
| T                                          | 14,260,745 | 18,448,151 | 12,593,086 | 16,432,700 | 13,829,846 | 13,864,097 | 12,761,479 | 13,761,618 | 22,087,679 | 22,087,679              |
| G                                          | 6,949,028  | 9,104,009  | 6,309,862  | 8,089,551  | 6,767,494  | 6,953,707  | 6,250,397  | 6,804,308  | 11,798,469 | 11,798,469              |
| C                                          | 6,913,734  | 9,086,605  | 6,313,709  | 8,078,335  | 6,772,676  | 6,911,819  | 6,248,069  | 6,832,929  | 11,805,590 | 11,805,590              |
| n                                          | 616        | 1,004      | 835        | 820        | 739        | 876        | 549        | 807        | 1,449      | 1,449                   |
| N                                          | 5,271,063  | 8,645,101  | 7,064,334  | 7,406,356  | 6,556,804  | 7,964,949  | 4,607,700  | 7,371,013  | 19,829,585 | 19,829,585              |
| others                                     | 0          | 0          | 0          | 0          | 0          | 0          | 0          | 0          | 0          | 0                       |
| Total                                      | 47,645,759 | 63,731,624 | 44,866,005 | 56,437,177 | 47,721,588 | 49,553,705 | 42,658,284 | 48,533,994 | 87,626,052 | 87,626,052              |
| Total (ATGC)                               | 42,374,080 | 55,085,519 | 37,800,836 | 49,030,001 | 41,164,045 | 41,587,880 | 38,050,035 | 41,162,174 | 67,795,018 | 67,795,018              |
| GC% (ATGC)                                 | 32.7       | 33.0       | 33.4       | 33.0       | 32.9       | 33.3       | 32.8       | 33.1       | 34.8       | 34.8                    |
| Number of<br>sequences                     | 1          | 1          | 1          | 1          | 1          | 1          | 1          | 1          | 25,722     | 25,722                  |
| Total length of<br>sequences (bp)          | 47,645,759 | 63,731,624 | 44,866,005 | 56,437,177 | 47,721,588 | 49,553,705 | 42,658,284 | 48,533,994 | 87,626,052 | 87,626,052              |
| Numbers of included<br>TSUd_r1.1 scaffolds | 152        | 266        | 217        | 250        | 215        | 240        | 134        | 228        | 25,722     | 25,722                  |
| gap (N10000)                               | 1,510,000  | 2,650,000  | 2,160,000  | 2,490,000  | 2,140,000  | 2,390,000  | 1,330,000  | 2,270,000  | -          | -                       |
| Scaffolds length                           | 46,135,759 | 61,081,624 | 42,706,005 | 53,947,177 | 45,581,588 | 47,163,705 | 41,328,284 | 46,263,994 | -          | -                       |

<sup>a)</sup> The assembled genome sequences of Woogenellup. Assembly was done by SOAPdenovo2.

**Supplementary Table S5.** Length and ratio of repetitive sequences.

|               |                              |              |              | TSUd_r1.1            |                                               | TSUd_chr1            |                                               | TSUd_chr2            |                                                | TSUd_chr3            |                                                | TSUd_chr4            |                                               |
|---------------|------------------------------|--------------|--------------|----------------------|-----------------------------------------------|----------------------|-----------------------------------------------|----------------------|------------------------------------------------|----------------------|------------------------------------------------|----------------------|-----------------------------------------------|
|               |                              |              |              | Length occupied (bp) | % of whole genome <sup>b)</sup>               | Length occupied (bp) | % of whole genome <sup>b)</sup>               | Length occupied (bp) | % of whole core candidate genome <sup>b)</sup> | Length occupied (bp) | % of whole core candidate genome <sup>b)</sup> | Length occupied (bp) | % of whole line-specific genome <sup>b)</sup> |
| Known repeats | Intersperse d repeats        | Class I      | SINEs        | 289,531              | 0.1                                           | 39,889               | 0.1                                           | 38,356               | 0.1                                            | 23,684               | 0.1                                            | 42,493               | 0.1                                           |
|               |                              |              | LINES        | 8,375,876            | 1.7                                           | 884,570              | 1.9                                           | 1,144,210            | 1.8                                            | 812,757              | 1.8                                            | 971,606              | 1.7                                           |
|               |                              | LTR elements | Total        | 43,951,472           | 9.0                                           | 2,597,863            | 5.5                                           | 4,538,855            | 7.1                                            | 4,161,991            | 9.3                                            | 3,849,403            | 6.8                                           |
|               |                              |              | Copia        | 26,421,465           | 5.4                                           | 1,670,314            | 3.5                                           | 2,984,859            | 4.7                                            | 2,664,725            | 5.9                                            | 2,485,444            | 4.4                                           |
|               |                              |              | Gypsy        | 17,167,590           | 3.5                                           | 896,215              | 1.9                                           | 1,519,517            | 2.4                                            | 1,455,428            | 3.2                                            | 1,324,537            | 2.3                                           |
|               |                              | Class II     | DNA elements | 8,679,302            | 1.8                                           | 984,309              | 2.1                                           | 1,189,473            | 1.9                                            | 770,760              | 1.7                                            | 1,063,126            | 1.9                                           |
|               | Unclassified                 | 183          | 0.0          | 0                    | 0.0                                           | 133                  | 0.0                                           | 0                    | 0.0                                            | 0                    | 0.0                                            |                      |                                               |
|               | Helitrons                    | 1,234,098    | 0.3          | 51,351               | 0.1                                           | 168,634              | 0.3                                           | 149,060              | 0.3                                            | 88,949               | 0.2                                            |                      |                                               |
|               | Low complexity <sup>a)</sup> | 2,241,716    | 0.5          | 233,574              | 0.5                                           | 296,764              | 0.5                                           | 200,258              | 0.4                                            | 275,323              | 0.5                                            |                      |                                               |
|               | Simple repeat                | 7,740,338    | 1.6          | 791,804              | 1.7                                           | 1,024,424            | 1.6                                           | 688,735              | 1.5                                            | 924,186              | 1.6                                            |                      |                                               |
|               | Unknown                      | 13,108       | 0.0          | 2,529                | 0.0                                           | 4,401                | 0.0                                           | 563                  | 0.0                                            | 1,372                | 0.0                                            |                      |                                               |
|               | Subtotal                     | 72,916,494   | 14.9         | 5,619,314            | 11.8                                          | 8,442,750            | 13.2                                          | 6,852,403            | 15.3                                           | 7,257,660            | 12.9                                           |                      |                                               |
|               | Unique repeats               | Unknown      | 143,707,770  | 29.4                 | 11,817,328                                    | 24.8                 | 17,077,270                                    | 26.8                 | 13,694,818                                     | 30.5                 | 15,020,491                                     | 26.6                 |                                               |
| Simple repeat |                              | 191,559      | 0.0          | 18,886               | 0.0                                           | 25,714               | 0.0                                           | 16,267               | 0.0                                            | 22,324               | 0.0                                            |                      |                                               |
| Subtotal      |                              | 143,899,329  | 29.4         | 11,836,214           | 24.8                                          | 17,102,984           | 26.8                                          | 13,711,085           | 30.6                                           | 15,042,815           | 26.7                                           |                      |                                               |
| <b>Total</b>  |                              |              |              | <b>216,815,823</b>   | <b>44.4</b>                                   | <b>17,455,528</b>    | <b>36.6</b>                                   | <b>25,545,734</b>    | <b>40.1</b>                                    | <b>20,563,488</b>    | <b>45.8</b>                                    | <b>22,300,475</b>    | <b>39.5</b>                                   |
|               |                              |              |              | TSUd_chr5            |                                               | TSUd_chr6            |                                               | TSUd_chr7            |                                                | TSUd_chr8            |                                                | Chr0                 |                                               |
|               |                              |              |              | Length occupied (bp) | % of whole line-specific genome <sup>b)</sup> | Length occupied (bp) | % of whole line-specific genome <sup>b)</sup> | Length occupied (bp) | % of whole line-specific genome <sup>b)</sup>  | Length occupied (bp) | % of whole line-specific genome <sup>b)</sup>  | Length occupied (bp) | % of whole line-specific genome <sup>b)</sup> |
| Known repeats | Intersperse d repeats        | Class I      | SINEs        | 32,580               | 0.1                                           | 28,139               | 0.1                                           | 31,582               | 0.1                                            | 30,497               | 0.1                                            | 22,311               | 0.0                                           |
|               |                              |              | LINES        | 853,708              | 1.8                                           | 942,373              | 1.9                                           | 757,412              | 1.8                                            | 835,538              | 1.7                                            | 1,173,702            | 1.3                                           |
|               |                              | LTR elements | Total        | 3,419,607            | 7.2                                           | 4,736,591            | 9.6                                           | 2,354,540            | 5.5                                            | 3,999,727            | 8.2                                            | 14,292,895           | 16.3                                          |
|               |                              |              | Copia        | 2,220,268            | 4.7                                           | 3,133,481            | 6.3                                           | 1,536,942            | 3.6                                            | 2,502,206            | 5.2                                            | 7,223,226            | 8.2                                           |
|               |                              |              | Gypsy        | 1,166,462            | 2.4                                           | 1,566,943            | 3.2                                           | 792,640              | 1.9                                            | 1,467,098            | 3.0                                            | 6,978,750            | 8.0                                           |
|               |                              | Class II     | DNA elements | 876,264              | 1.8                                           | 848,467              | 1.7                                           | 840,359              | 2.0                                            | 854,884              | 1.8                                            | 1,251,660            | 1.4                                           |
|               | Unclassified                 | 0            | 0.0          | 0                    | 0.0                                           | 50                   | 0.0                                           | 0                    | 0.0                                            | 0                    | 0.0                                            |                      |                                               |
|               | Helitrons                    | 136,654      | 0.3          | 209,165              | 0.4                                           | 76,104               | 0.2                                           | 183,565              | 0.4                                            | 170,616              | 0.2                                            |                      |                                               |
|               | Low complexity <sup>a)</sup> | 216,030      | 0.5          | 224,034              | 0.5                                           | 202,810              | 0.5                                           | 217,202              | 0.4                                            | 375,721              | 0.4                                            |                      |                                               |
|               | Simple repeat                | 770,438      | 1.6          | 781,088              | 1.6                                           | 712,766              | 1.7                                           | 788,750              | 1.6                                            | 1,258,147            | 1.4                                            |                      |                                               |
|               | Unknown                      | 823          | 0.0          | 989                  | 0.0                                           | 1,041                | 0.0                                           | 492                  | 0.0                                            | 898                  | 0.0                                            |                      |                                               |
|               | Subtotal                     | 6,340,276    | 13.3         | 7,810,120            | 15.8                                          | 5,002,967            | 11.7                                          | 6,943,787            | 14.3                                           | 18,647,217           | 21.3                                           |                      |                                               |
|               | Unique repeats               | Unknown      | 12,864,716   | 27.0                 | 14,990,411                                    | 30.3                 | 10,379,513                                    | 24.3                 | 14,255,651                                     | 29.4                 | 33,607,572                                     | 38.4                 |                                               |
| Simple repeat |                              | 19,407       | 0.0          | 17,870               | 0.0                                           | 18,191               | 0.0                                           | 19,554               | 0.0                                            | 33,346               | 0.0                                            |                      |                                               |
| Subtotal      |                              | 12,884,123   | 27.0         | 15,008,281           | 30.3                                          | 10,397,704           | 24.4                                          | 14,275,205           | 29.4                                           | 33,640,918           | 38.4                                           |                      |                                               |
| <b>Total</b>  |                              |              |              | <b>19,224,399</b>    | <b>40.3</b>                                   | <b>22,818,401</b>    | <b>46.0</b>                                   | <b>15,400,671</b>    | <b>36.1</b>                                    | <b>21,218,992</b>    | <b>43.7</b>                                    | <b>52,288,135</b>    | <b>59.7</b>                                   |

<sup>a)</sup> Primarily poly-purine/poly-pyrimidine stretches, or regions of extremely high AT or GC content. Stretches of DNA (100 bp) were masked when they were >87% AT or >89% GC, and 30 bp stretches were masked when they contained 29 A/T (or GC) nucleotides.

<sup>b)</sup> N bases were excluded from the calculation.

**Supplementary Table S6.** Length and ratio of unique repetitive sequences in the higher ratio of repetitive sequences was observed in the subterranean clover pseudomolecules <sup>a)</sup>.

|       | Common <sup>b)</sup> |      | subterranean clover specific |      | Total       |
|-------|----------------------|------|------------------------------|------|-------------|
|       | length (bp)          | (%)  | length (bp)                  | (%)  | length (bp) |
| Chr1  | 7,904,210            | 68.5 | 3,631,815                    | 31.5 | 11,536,025  |
| Chr2  | 10,490,020           | 63.1 | 6,142,585                    | 36.9 | 16,632,605  |
| Chr3  | 7,600,585            | 57.1 | 5,701,902                    | 42.9 | 13,302,487  |
| Chr4  | 9,414,513            | 64.3 | 5,229,790                    | 35.7 | 14,644,303  |
| Chr5  | 8,081,505            | 64.4 | 4,468,044                    | 35.6 | 12,549,549  |
| Chr6  | 8,561,755            | 58.8 | 6,006,949                    | 41.2 | 14,568,704  |
| Chr7  | 6,984,383            | 68.9 | 3,147,948                    | 31.1 | 10,132,331  |
| Chr8  | 8,341,880            | 60.2 | 5,523,449                    | 39.8 | 13,865,329  |
| Total | 67,378,851           | 62.8 | 39,852,482                   | 37.2 | 107,231,333 |

<sup>a)</sup> Exclude simple repeats and overlapped repeat sequences.

<sup>b)</sup> Commonly observed in at least one of the other four legume species (red clover v2.1, *M. truncatula* 4.0v1, *L. japonicus* rel.3.0 and common bean v1.0)



**Supplementary Table S7.** Simple sequence repeat (SSR) distribution in the assembled genomes.

| SSR pattern | <i>Trifolium subterraneum</i><br>(TSUd_r1.1_pseudomolecule) |                           |      | <i>Trifolium pratense</i> L. (v2.1)       |                           |      | <i>Medicago truncatula</i> (4.0v1)        |                           |      | <i>Lotus japonicus</i> (Lj3.0)            |                           |      | <i>Phaseolus vulgaris</i> (v1.0)          |                           |      |
|-------------|-------------------------------------------------------------|---------------------------|------|-------------------------------------------|---------------------------|------|-------------------------------------------|---------------------------|------|-------------------------------------------|---------------------------|------|-------------------------------------------|---------------------------|------|
|             | Number of<br>SSR in<br>genome<br>assembly                   | Frequency (Number/100 kb) |      | Number of<br>SSR in<br>genome<br>assembly | Frequency (Number/100 kb) |      | Number of<br>SSR in<br>genome<br>assembly | Frequency (Number/100 kb) |      | Number of<br>SSR in<br>genome<br>assembly | Frequency (Number/100 kb) |      | Number of<br>SSR in<br>genome<br>assembly | Frequency (Number/100 kb) |      |
|             |                                                             | Overall                   | CDS  |                                           | Overall                   | CDS  |                                           | Overall                   | CDS  |                                           | Overall                   | CDS  |                                           | Overall                   | CDS  |
| AC          | 2,451                                                       | 0.50                      | 0.01 | 2,055                                     | 0.59                      | 0.05 | 2,599                                     | 0.63                      | 0.03 | 2,125                                     | 0.47                      | 0.03 | 1,319                                     | 0.25                      | 0.02 |
| AG          | 6,339                                                       | 1.30                      | 0.08 | 4,423                                     | 1.28                      | 0.34 | 6,546                                     | 1.59                      | 0.23 | 6,622                                     | 1.48                      | 0.23 | 3,565                                     | 0.68                      | 0.14 |
| AT          | 17,482                                                      | 3.58                      | 0.00 | 12,303                                    | 3.56                      | 0.11 | 16,074                                    | 3.90                      | 0.02 | 11,445                                    | 2.56                      | 0.02 | 25,713                                    | 4.93                      | 0.01 |
| CG          | 17                                                          | 0.00                      | -    | 4                                         | 0.00                      | -    | 18                                        | 0.00                      | -    | 11                                        | 0.00                      | -    | 8                                         | 0.00                      | -    |
| Sub-total   | 26,289                                                      | 5.38                      | 0.09 | 18,785                                    | 5.43                      | 0.50 | 25,237                                    | 6.12                      | 0.28 | 20,203                                    | 4.51                      | 0.28 | 30,605                                    | 5.86                      | 0.17 |
| AAC         | 2,034                                                       | 0.42                      | 0.79 | 1,642                                     | 0.47                      | 1.18 | 2,638                                     | 0.64                      | 0.77 | 1,627                                     | 0.36                      | 0.77 | 496                                       | 0.10                      | 0.33 |
| AAG         | 3,059                                                       | 0.63                      | 1.05 | 2,567                                     | 0.74                      | 1.80 | 3,028                                     | 0.74                      | 1.63 | 4,239                                     | 0.95                      | 1.51 | 2,451                                     | 0.47                      | 1.33 |
| AAT         | 13,860                                                      | 2.84                      | 0.24 | 8,799                                     | 2.54                      | 0.66 | 5,663                                     | 1.38                      | 0.18 | 3,339                                     | 0.75                      | 0.03 | 11,143                                    | 2.14                      | 0.09 |
| ACC         | 757                                                         | 0.15                      | 0.85 | 637                                       | 0.18                      | 0.79 | 666                                       | 0.16                      | 0.71 | 3,231                                     | 0.72                      | 1.65 | 562                                       | 0.11                      | 0.87 |
| ACG         | 36                                                          | 0.01                      | 0.03 | 32                                        | 0.01                      | 0.05 | 54                                        | 0.01                      | 0.06 | 64                                        | 0.01                      | 0.07 | 44                                        | 0.01                      | 0.09 |
| ACT         | 414                                                         | 0.08                      | 0.12 | 524                                       | 0.15                      | 0.20 | 244                                       | 0.06                      | 0.10 | 233                                       | 0.05                      | 0.06 | 114                                       | 0.02                      | 0.02 |
| AGC         | 193                                                         | 0.04                      | 0.22 | 246                                       | 0.07                      | 0.39 | 229                                       | 0.06                      | 0.31 | 380                                       | 0.08                      | 0.57 | 363                                       | 0.07                      | 0.38 |
| AGG         | 324                                                         | 0.07                      | 0.42 | 371                                       | 0.11                      | 0.55 | 430                                       | 0.10                      | 0.48 | 1,134                                     | 0.25                      | 0.83 | 350                                       | 0.07                      | 0.71 |
| ATC         | 2,159                                                       | 0.44                      | 1.13 | 1,866                                     | 0.54                      | 1.74 | 1,517                                     | 0.37                      | 1.17 | 1,723                                     | 0.39                      | 1.09 | 990                                       | 0.19                      | 0.70 |
| CCG         | 34                                                          | 0.01                      | 0.03 | 13                                        | 0.00                      | 0.02 | 28                                        | 0.01                      | 0.03 | 244                                       | 0.05                      | 0.26 | 113                                       | 0.02                      | 0.29 |
| Sub-total   | 22,870                                                      | 4.69                      | 4.88 | 16,697                                    | 4.81                      | 7.38 | 14,497                                    | 3.53                      | 5.44 | 16,214                                    | 3.61                      | 6.84 | 16,626                                    | 3.20                      | 4.81 |
| AAAC        | 398                                                         | 0.08                      | 0.00 | 573                                       | 0.17                      | 0.02 | 309                                       | 0.08                      | 0.00 | 287                                       | 0.06                      | 0.00 | 171                                       | 0.03                      | -    |
| AAAG        | 505                                                         | 0.10                      | 0.01 | 619                                       | 0.18                      | 0.05 | 660                                       | 0.16                      | 0.02 | 664                                       | 0.15                      | 0.02 | 516                                       | 0.10                      | 0.01 |
| AAAT        | 4,803                                                       | 0.98                      | -    | 4,271                                     | 1.23                      | 0.03 | 2,858                                     | 0.69                      | 0.02 | 1,591                                     | 0.36                      | 0.00 | 4,822                                     | 0.93                      | 0.00 |
| AACC        | 54                                                          | 0.01                      | -    | 81                                        | 0.02                      | 0.01 | 31                                        | 0.01                      | 0.00 | 52                                        | 0.01                      | 0.01 | 33                                        | 0.01                      | -    |
| AACG        | 7                                                           | 0.00                      | -    | 12                                        | 0.00                      | -    | 7                                         | 0.00                      | -    | 15                                        | 0.00                      | -    | 8                                         | 0.00                      | -    |
| AACT        | 545                                                         | 0.11                      | -    | 489                                       | 0.14                      | 0.00 | 201                                       | 0.05                      | -    | 306                                       | 0.07                      | -    | 63                                        | 0.01                      | -    |
| AAGC        | 20                                                          | 0.00                      | -    | 44                                        | 0.01                      | 0.00 | 31                                        | 0.01                      | 0.01 | 26                                        | 0.01                      | -    | 25                                        | 0.00                      | -    |
| AAGG        | 30                                                          | 0.01                      | 0.00 | 58                                        | 0.02                      | 0.01 | 70                                        | 0.02                      | 0.01 | 60                                        | 0.01                      | -    | 56                                        | 0.01                      | -    |
| AAGT        | 28                                                          | 0.01                      | -    | 63                                        | 0.02                      | -    | 19                                        | 0.00                      | -    | 13                                        | 0.00                      | -    | 20                                        | 0.00                      | -    |
| AATC        | 127                                                         | 0.03                      | -    | 139                                       | 0.04                      | 0.01 | 104                                       | 0.03                      | -    | 165                                       | 0.04                      | -    | 51                                        | 0.01                      | 0.00 |
| AATG        | 472                                                         | 0.10                      | 0.00 | 588                                       | 0.17                      | 0.03 | 270                                       | 0.07                      | 0.00 | 219                                       | 0.05                      | 0.01 | 195                                       | 0.04                      | -    |
| AATT        | 851                                                         | 0.17                      | -    | 880                                       | 0.25                      | -    | 524                                       | 0.13                      | -    | 383                                       | 0.09                      | -    | 666                                       | 0.13                      | -    |
| ACAG        | 7                                                           | 0.00                      | 0.00 | 16                                        | 0.00                      | 0.00 | 25                                        | 0.01                      | -    | 22                                        | 0.00                      | 0.00 | 3                                         | 0.00                      | -    |
| ACCC        | 20                                                          | 0.00                      | -    | 13                                        | 0.00                      | 0.00 | 29                                        | 0.01                      | 0.01 | 22                                        | 0.00                      | -    | 18                                        | 0.00                      | -    |
| ACCG        | 1                                                           | 0.00                      | -    | 1                                         | 0.00                      | -    | -                                         | -                         | -    | -                                         | -                         | -    | 49                                        | 0.01                      | -    |
| ACCT        | 16                                                          | 0.00                      | -    | 24                                        | 0.01                      | 0.00 | 8                                         | 0.00                      | -    | 7                                         | 0.00                      | -    | 13                                        | 0.00                      | -    |
| ACGC        | 42                                                          | 0.01                      | -    | 102                                       | 0.03                      | 0.00 | 26                                        | 0.01                      | -    | 21                                        | 0.00                      | 0.00 | 9                                         | 0.00                      | -    |
| ACGG        | -                                                           | -                         | -    | 3                                         | 0.00                      | -    | 3                                         | 0.00                      | -    | 4                                         | 0.00                      | -    | 2                                         | 0.00                      | -    |
| ACGT        | 1                                                           | 0.00                      | -    | 5                                         | 0.00                      | -    | 4                                         | 0.00                      | -    | 1                                         | 0.00                      | -    | 3                                         | 0.00                      | -    |
| ACTC        | 119                                                         | 0.02                      | -    | 178                                       | 0.05                      | 0.02 | 113                                       | 0.03                      | 0.01 | 227                                       | 0.05                      | 0.01 | 129                                       | 0.02                      | 0.00 |
| ACTG        | 9                                                           | 0.00                      | -    | 10                                        | 0.00                      | -    | 3                                         | 0.00                      | -    | 5                                         | 0.00                      | -    | 5                                         | 0.00                      | -    |
| AGCC        | 6                                                           | 0.00                      | 0.00 | 11                                        | 0.00                      | -    | 5                                         | 0.00                      | 0.00 | 7                                         | 0.00                      | -    | 3                                         | 0.00                      | -    |
| AGCG        | 4                                                           | 0.00                      | -    | 5                                         | 0.00                      | 0.00 | 6                                         | 0.00                      | -    | 14                                        | 0.00                      | -    | 1                                         | 0.00                      | -    |
| AGCT        | 29                                                          | 0.01                      | -    | 57                                        | 0.02                      | -    | 30                                        | 0.01                      | -    | 49                                        | 0.01                      | -    | 10                                        | 0.00                      | -    |
| AGGC        | 7                                                           | 0.00                      | -    | 9                                         | 0.00                      | -    | 1                                         | 0.00                      | -    | 4                                         | 0.00                      | -    | 1                                         | 0.00                      | -    |
| AGGG        | 151                                                         | 0.03                      | 0.01 | 69                                        | 0.02                      | 0.01 | 203                                       | 0.05                      | 0.01 | 84                                        | 0.02                      | 0.01 | 24                                        | 0.00                      | 0.01 |
| ATAC        | 1,400                                                       | 0.29                      | 0.00 | 344                                       | 0.10                      | 0.01 | 315                                       | 0.08                      | -    | 176                                       | 0.04                      | 0.01 | 177                                       | 0.03                      | -    |
| ATAG        | 232                                                         | 0.05                      | 0.00 | 404                                       | 0.12                      | 0.00 | 400                                       | 0.10                      | 0.01 | 913                                       | 0.20                      | 0.01 | 254                                       | 0.05                      | -    |
| ATCC        | 38                                                          | 0.01                      | -    | 70                                        | 0.02                      | 0.01 | 36                                        | 0.01                      | -    | 19                                        | 0.00                      | -    | 33                                        | 0.01                      | -    |
| ATCG        | 3                                                           | 0.00                      | -    | 6                                         | 0.00                      | 0.00 | 6                                         | 0.00                      | -    | 7                                         | 0.00                      | -    | 1                                         | 0.00                      | -    |
| ATGC        | 38                                                          | 0.01                      | 0.00 | 44                                        | 0.01                      | 0.01 | 64                                        | 0.02                      | 0.00 | 22                                        | 0.00                      | -    | 60                                        | 0.01                      | -    |
| CCCG        | -                                                           | -                         | -    | -                                         | -                         | -    | -                                         | -                         | -    | -                                         | -                         | -    | 1                                         | 0.00                      | -    |
| CCGG        | -                                                           | -                         | -    | 1                                         | 0.00                      | -    | -                                         | -                         | -    | -                                         | -                         | -    | 1                                         | 0.00                      | -    |
| Sub-total   | 9,963                                                       | 2.03                      | 0.02 | 9,189                                     | 2.63                      | 0.22 | 6,361                                     | 1.58                      | 0.10 | 5,385                                     | 1.17                      | 0.08 | 7,423                                     | 1.40                      | 0.02 |

|       |     |      |   |     |      |      |     |      |      |     |      |      |     |      |      |
|-------|-----|------|---|-----|------|------|-----|------|------|-----|------|------|-----|------|------|
| AAAAC | 106 | 0.02 | - | 155 | 0.04 | 0.01 | 125 | 0.03 | 0.00 | 82  | 0.02 | -    | 41  | 0.01 | -    |
| AAAAG | 83  | 0.02 | - | 108 | 0.03 | 0.00 | 98  | 0.02 | 0.01 | 120 | 0.03 | 0.01 | 147 | 0.03 | -    |
| AAAAT | 612 | 0.13 | - | 568 | 0.16 | 0.00 | 805 | 0.20 | 0.00 | 284 | 0.06 | -    | 834 | 0.16 | -    |
| AAACC | 115 | 0.02 | - | 86  | 0.02 | -    | 119 | 0.03 | 0.00 | 50  | 0.01 | 0.00 | 33  | 0.01 | -    |
| AAACG | -   | -    | - | 1   | 0.00 | -    | -   | -    | -    | 2   | 0.00 | -    | 8   | 0.00 | -    |
| AAACT | 11  | 0.00 | - | 11  | 0.00 | -    | 10  | 0.00 | -    | 10  | 0.00 | -    | 1   | 0.00 | -    |
| AAAGC | 4   | 0.00 | - | 8   | 0.00 | -    | 1   | 0.00 | -    | 6   | 0.00 | -    | 3   | 0.00 | -    |
| AAAGG | 6   | 0.00 | - | 9   | 0.00 | -    | 10  | 0.00 | -    | 20  | 0.00 | -    | 12  | 0.00 | 0.00 |
| AAAGT | 2   | 0.00 | - | 5   | 0.00 | -    | 3   | 0.00 | -    | 6   | 0.00 | -    | 3   | 0.00 | -    |
| AAATC | 25  | 0.01 | - | 26  | 0.01 | -    | 39  | 0.01 | -    | 44  | 0.01 | -    | 39  | 0.01 | -    |
| AAATG | 14  | 0.00 | - | 26  | 0.01 | -    | 25  | 0.01 | -    | 25  | 0.01 | -    | 15  | 0.00 | -    |
| AAATT | 98  | 0.02 | - | 96  | 0.03 | -    | 91  | 0.02 | -    | 86  | 0.02 | -    | 158 | 0.03 | -    |
| AACAC | 23  | 0.00 | - | 85  | 0.02 | 0.01 | 49  | 0.01 | -    | 56  | 0.01 | -    | 39  | 0.01 | 0.00 |
| AACAG | 8   | 0.00 | - | 12  | 0.00 | -    | 15  | 0.00 | -    | 25  | 0.01 | -    | 8   | 0.00 | -    |
| AACAT | 21  | 0.00 | - | 36  | 0.01 | -    | 37  | 0.01 | 0.00 | 7   | 0.00 | -    | 4   | 0.00 | -    |
| AACCC | 8   | 0.00 | - | 4   | 0.00 | -    | 12  | 0.00 | -    | 44  | 0.01 | 0.00 | 7   | 0.00 | -    |
| AACCG | 8   | 0.00 | - | 6   | 0.00 | -    | 23  | 0.01 | -    | 50  | 0.01 | -    | 5   | 0.00 | -    |
| AACCT | 5   | 0.00 | - | 3   | 0.00 | -    | 3   | 0.00 | -    | 10  | 0.00 | -    | 3   | 0.00 | -    |
| AACGC | 1   | 0.00 | - | 4   | 0.00 | -    | 3   | 0.00 | -    | 1   | 0.00 | -    | -   | -    | -    |
| AACGG | -   | -    | - | 1   | 0.00 | -    | 1   | 0.00 | -    | 7   | 0.00 | -    | -   | -    | -    |
| AACGT | -   | -    | - | -   | -    | -    | 1   | 0.00 | -    | 1   | 0.00 | -    | 1   | 0.00 | -    |
| AACTC | 3   | 0.00 | - | 12  | 0.00 | 0.00 | 12  | 0.00 | -    | 21  | 0.00 | -    | 5   | 0.00 | -    |
| AACTG | 4   | 0.00 | - | 4   | 0.00 | 0.00 | 5   | 0.00 | -    | 6   | 0.00 | -    | 2   | 0.00 | -    |
| AACTT | 3   | 0.00 | - | 1   | 0.00 | -    | 2   | 0.00 | -    | -   | -    | -    | -   | -    | -    |
| AAGAC | 2   | 0.00 | - | 3   | 0.00 | -    | 2   | 0.00 | -    | 3   | 0.00 | -    | 4   | 0.00 | -    |
| AAGAG | 24  | 0.00 | - | 48  | 0.01 | 0.00 | 56  | 0.01 | 0.01 | 94  | 0.02 | 0.01 | 106 | 0.02 | 0.01 |
| AAGAT | 9   | 0.00 | - | 17  | 0.00 | -    | 24  | 0.01 | -    | 11  | 0.00 | -    | 6   | 0.00 | -    |
| AAGCC | -   | -    | - | 3   | 0.00 | 0.00 | 3   | 0.00 | -    | 2   | 0.00 | -    | 1   | 0.00 | -    |
| AAGCG | -   | -    | - | -   | -    | -    | 1   | 0.00 | -    | -   | -    | -    | -   | -    | -    |
| AAGCT | -   | -    | - | 4   | 0.00 | -    | -   | -    | -    | 6   | 0.00 | -    | 1   | 0.00 | -    |
| AAGGC | -   | -    | - | 2   | 0.00 | -    | 1   | 0.00 | -    | 1   | 0.00 | -    | 1   | 0.00 | -    |
| AAGGG | 1   | 0.00 | - | 3   | 0.00 | -    | 11  | 0.00 | -    | 16  | 0.00 | 0.00 | 6   | 0.00 | -    |
| AAGGT | 3   | 0.00 | - | 2   | 0.00 | -    | -   | -    | -    | 3   | 0.00 | -    | 4   | 0.00 | -    |
| AAGTC | -   | -    | - | 2   | 0.00 | -    | 2   | 0.00 | -    | 1   | 0.00 | -    | 1   | 0.00 | -    |
| AAGTG | 4   | 0.00 | - | 4   | 0.00 | -    | 5   | 0.00 | -    | 12  | 0.00 | -    | 10  | 0.00 | -    |
| AATAC | 25  | 0.01 | - | 20  | 0.01 | -    | 25  | 0.01 | 0.00 | 13  | 0.00 | -    | 5   | 0.00 | -    |
| AATAG | 9   | 0.00 | - | 26  | 0.01 | -    | 14  | 0.00 | -    | 13  | 0.00 | -    | 8   | 0.00 | -    |
| AATAT | 125 | 0.03 | - | 80  | 0.02 | -    | 107 | 0.03 | -    | 163 | 0.04 | -    | 191 | 0.04 | -    |
| AATCC | 8   | 0.00 | - | 18  | 0.01 | 0.00 | 12  | 0.00 | -    | 14  | 0.00 | -    | 2   | 0.00 | -    |
| AATCG | 3   | 0.00 | - | 2   | 0.00 | -    | 4   | 0.00 | -    | 7   | 0.00 | -    | 2   | 0.00 | -    |
| AATCT | 17  | 0.00 | - | 50  | 0.01 | -    | 13  | 0.00 | -    | 18  | 0.00 | -    | 4   | 0.00 | -    |
| AATGC | 7   | 0.00 | - | 31  | 0.01 | 0.00 | 10  | 0.00 | -    | 6   | 0.00 | -    | 4   | 0.00 | -    |
| AATGG | 12  | 0.00 | - | 25  | 0.01 | -    | 16  | 0.00 | 0.00 | 14  | 0.00 | -    | 3   | 0.00 | -    |
| AATGT | 10  | 0.00 | - | 24  | 0.01 | -    | 16  | 0.00 | -    | 8   | 0.00 | -    | 4   | 0.00 | -    |
| AATTC | 26  | 0.01 | - | 46  | 0.01 | 0.01 | 44  | 0.01 | -    | 43  | 0.01 | 0.00 | 12  | 0.00 | -    |
| ACACC | 5   | 0.00 | - | 7   | 0.00 | -    | 10  | 0.00 | -    | 26  | 0.01 | -    | 9   | 0.00 | -    |
| ACACG | -   | -    | - | 3   | 0.00 | -    | 1   | 0.00 | -    | 3   | 0.00 | -    | -   | -    | -    |
| ACACT | 5   | 0.00 | - | 9   | 0.00 | 0.00 | 2   | 0.00 | -    | 4   | 0.00 | -    | 2   | 0.00 | -    |
| ACAGC | 2   | 0.00 | - | 5   | 0.00 | -    | 2   | 0.00 | -    | 11  | 0.00 | -    | 5   | 0.00 | -    |
| ACAGG | -   | -    | - | 1   | 0.00 | -    | 1   | 0.00 | -    | 2   | 0.00 | -    | 1   | 0.00 | -    |
| ACAGT | -   | -    | - | 3   | 0.00 | -    | 1   | 0.00 | -    | 2   | 0.00 | -    | -   | -    | -    |
| ACCAG | 2   | 0.00 | - | -   | -    | -    | 2   | 0.00 | -    | -   | -    | -    | 2   | 0.00 | -    |
| ACCCC | 6   | 0.00 | - | -   | -    | -    | 8   | 0.00 | -    | 10  | 0.00 | -    | 2   | 0.00 | -    |
| ACCCG | -   | -    | - | 2   | 0.00 | -    | -   | -    | -    | 51  | 0.01 | -    | 5   | 0.00 | -    |
| ACCCT | 1   | 0.00 | - | 4   | 0.00 | -    | 2   | 0.00 | -    | -   | -    | -    | -   | -    | -    |
| ACCGC | -   | -    | - | -   | -    | -    | 1   | 0.00 | -    | 1   | 0.00 | -    | 1   | 0.00 | -    |

|           |       |      |      |       |      |      |       |      |      |       |      |      |       |      |      |
|-----------|-------|------|------|-------|------|------|-------|------|------|-------|------|------|-------|------|------|
| ACCGG     | 2     | 0.00 | -    | 4     | 0.00 | -    | 2     | 0.00 | -    | 6     | 0.00 | -    | -     | -    | -    |
| ACCGT     | -     | -    | -    | -     | -    | -    | 1     | 0.00 | -    | -     | -    | -    | -     | -    | -    |
| ACCTC     | 3     | 0.00 | -    | 4     | 0.00 | -    | 3     | 0.00 | -    | 12    | 0.00 | 0.00 | 1     | 0.00 | -    |
| ACCTG     | 1     | 0.00 | -    | 1     | 0.00 | -    | 1     | 0.00 | -    | 3     | 0.00 | -    | -     | -    | -    |
| ACGAG     | -     | -    | -    | 2     | 0.00 | -    | 1     | 0.00 | -    | 2     | 0.00 | -    | -     | -    | -    |
| ACGCC     | -     | -    | -    | -     | -    | -    | 3     | 0.00 | -    | 5     | 0.00 | -    | 2     | 0.00 | -    |
| ACGCT     | -     | -    | -    | 2     | 0.00 | -    | -     | -    | -    | -     | -    | -    | -     | -    | -    |
| ACGGG     | 1     | 0.00 | -    | -     | -    | -    | -     | -    | -    | -     | -    | -    | -     | -    | -    |
| ACTAG     | 3     | 0.00 | -    | 8     | 0.00 | -    | 3     | 0.00 | -    | 1     | 0.00 | -    | 2     | 0.00 | -    |
| ACTCC     | 2     | 0.00 | 0.00 | 2     | 0.00 | -    | 1     | 0.00 | -    | 28    | 0.01 | 0.00 | -     | -    | -    |
| ACTCG     | 2     | 0.00 | -    | -     | -    | -    | 1     | 0.00 | -    | 1     | 0.00 | -    | -     | -    | -    |
| ACTCT     | -     | -    | -    | 4     | 0.00 | -    | -     | -    | -    | 2     | 0.00 | -    | 2     | 0.00 | -    |
| ACTGC     | -     | -    | -    | 6     | 0.00 | -    | 1     | 0.00 | -    | 1     | 0.00 | -    | -     | -    | -    |
| AGAGC     | 1     | 0.00 | -    | 4     | 0.00 | -    | -     | -    | -    | 2     | 0.00 | -    | 1     | 0.00 | -    |
| AGAGG     | 7     | 0.00 | -    | 7     | 0.00 | -    | 14    | 0.00 | 0.00 | 14    | 0.00 | 0.00 | 5     | 0.00 | -    |
| AGCCC     | 2     | 0.00 | -    | 1     | 0.00 | -    | -     | -    | -    | 5     | 0.00 | -    | 3     | 0.00 | -    |
| AGCCG     | -     | -    | -    | -     | -    | -    | -     | -    | -    | 11    | 0.00 | -    | 1     | 0.00 | -    |
| AGCCT     | -     | -    | -    | 1     | 0.00 | -    | 1     | 0.00 | -    | -     | -    | -    | 1     | 0.00 | -    |
| AGCGG     | -     | -    | -    | -     | -    | -    | -     | -    | -    | 1     | 0.00 | -    | -     | -    | -    |
| AGCTC     | -     | -    | -    | 3     | 0.00 | -    | -     | -    | -    | -     | -    | -    | -     | -    | -    |
| AGGCC     | -     | -    | -    | 71    | 0.02 | -    | 35    | 0.01 | 0.00 | 7     | 0.00 | -    | -     | -    | -    |
| AGGCG     | -     | -    | -    | -     | -    | -    | -     | -    | -    | 2     | 0.00 | -    | 2     | 0.00 | -    |
| AGGGC     | -     | -    | -    | -     | -    | -    | -     | -    | -    | 1     | 0.00 | -    | -     | -    | -    |
| AGGGG     | 83    | 0.02 | -    | 63    | 0.02 | -    | 95    | 0.02 | 0.01 | 129   | 0.03 | -    | 4     | 0.00 | -    |
| ATACC     | 3     | 0.00 | -    | 5     | 0.00 | -    | 2     | 0.00 | -    | 5     | 0.00 | -    | -     | -    | -    |
| ATACG     | 5     | 0.00 | -    | -     | -    | -    | 3     | 0.00 | -    | 1     | 0.00 | -    | -     | -    | -    |
| ATACT     | 13    | 0.00 | -    | 34    | 0.01 | -    | 16    | 0.00 | -    | 10    | 0.00 | -    | 3     | 0.00 | -    |
| ATAGC     | 2     | 0.00 | -    | 16    | 0.00 | 0.00 | 3     | 0.00 | -    | 6     | 0.00 | -    | 7     | 0.00 | -    |
| ATAGG     | 3     | 0.00 | -    | 25    | 0.01 | -    | 5     | 0.00 | -    | 9     | 0.00 | 0.00 | 1     | 0.00 | -    |
| ATATC     | 26    | 0.01 | -    | 38    | 0.01 | -    | 32    | 0.01 | -    | 39    | 0.01 | -    | 17    | 0.00 | -    |
| ATCAC     | 3     | 0.00 | -    | 14    | 0.00 | -    | 5     | 0.00 | -    | 9     | 0.00 | -    | 5     | 0.00 | -    |
| ATCAG     | 1     | 0.00 | -    | 3     | 0.00 | -    | 2     | 0.00 | -    | 3     | 0.00 | -    | -     | -    | -    |
| ATCCC     | 1     | 0.00 | -    | 10    | 0.00 | -    | 3     | 0.00 | -    | 1     | 0.00 | -    | 3     | 0.00 | -    |
| ATCCG     | 1     | 0.00 | -    | -     | -    | -    | 2     | 0.00 | -    | 3     | 0.00 | -    | 1     | 0.00 | -    |
| ATCGC     | -     | -    | -    | -     | -    | -    | 1     | 0.00 | -    | 3     | 0.00 | -    | -     | -    | -    |
| ATCTC     | 4     | 0.00 | -    | 24    | 0.01 | 0.00 | 19    | 0.00 | -    | 17    | 0.00 | -    | 16    | 0.00 | -    |
| ATGAC     | 4     | 0.00 | -    | 5     | 0.00 | -    | 5     | 0.00 | -    | 5     | 0.00 | -    | 3     | 0.00 | -    |
| ATGCC     | 1     | 0.00 | -    | 7     | 0.00 | -    | 4     | 0.00 | -    | 8     | 0.00 | 0.00 | 3     | 0.00 | -    |
| CCCCG     | 7     | 0.00 | 0.00 | -     | -    | -    | 2     | 0.00 | -    | 2     | 0.00 | -    | 11    | 0.00 | -    |
| CCCGG     | -     | -    | -    | 1     | 0.00 | -    | 1     | 0.00 | -    | 1     | 0.00 | -    | -     | -    | -    |
| CCGCG     | -     | -    | -    | -     | -    | -    | -     | -    | -    | 1     | 0.00 | -    | -     | -    | -    |
| Sub-total | 1,647 | 0.30 | 0.00 | 2,076 | 0.52 | 0.03 | 2,152 | 0.46 | 0.03 | 1,877 | 0.34 | 0.02 | 1,864 | 0.32 | 0.01 |

|        |     |      |      |     |      |      |     |      |      |    |      |      |     |      |      |
|--------|-----|------|------|-----|------|------|-----|------|------|----|------|------|-----|------|------|
| AAAAAC | 24  | 0.00 | 0.00 | 44  | 0.01 | 0.00 | 40  | 0.01 | 0.01 | 33 | 0.01 | -    | 10  | 0.00 | -    |
| AAAAAG | 34  | 0.01 | -    | 27  | 0.01 | 0.00 | 46  | 0.01 | 0.01 | 32 | 0.01 | -    | 73  | 0.01 | -    |
| AAAAAT | 113 | 0.02 | -    | 104 | 0.03 | 0.00 | 130 | 0.03 | -    | 86 | 0.02 | -    | 122 | 0.02 | -    |
| AAAACC | 9   | 0.00 | -    | 6   | 0.00 | -    | 12  | 0.00 | 0.01 | 11 | 0.00 | 0.02 | 5   | 0.00 | 0.00 |
| AAAACG | 1   | 0.00 | -    | -   | -    | -    | 5   | 0.00 | -    | 1  | 0.00 | -    | 13  | 0.00 | -    |
| AAAACT | 15  | 0.00 | -    | 5   | 0.00 | -    | 1   | 0.00 | -    | 1  | 0.00 | -    | 1   | 0.00 | -    |
| AAAAGC | 2   | 0.00 | -    | 2   | 0.00 | 0.00 | 2   | 0.00 | 0.00 | 4  | 0.00 | -    | 1   | 0.00 | -    |
| AAAAGG | 5   | 0.00 | 0.01 | 1   | 0.00 | -    | 5   | 0.00 | 0.00 | 8  | 0.00 | 0.00 | 5   | 0.00 | 0.00 |
| AAAAGT | 2   | 0.00 | -    | 1   | 0.00 | -    | 3   | 0.00 | -    | -  | -    | -    | -   | -    | -    |
| AAAATC | 23  | 0.00 | 0.00 | 29  | 0.01 | 0.01 | 26  | 0.01 | 0.01 | 23 | 0.01 | 0.00 | 9   | 0.00 | -    |
| AAAATG | 6   | 0.00 | -    | 13  | 0.00 | 0.00 | 18  | 0.00 | -    | 7  | 0.00 | -    | 11  | 0.00 | -    |
| AAAATT | 15  | 0.00 | -    | 13  | 0.00 | -    | 20  | 0.00 | -    | 24 | 0.01 | -    | 41  | 0.01 | -    |
| AAACAC | 7   | 0.00 | -    | 12  | 0.00 | 0.01 | 14  | 0.00 | 0.00 | 19 | 0.00 | -    | 7   | 0.00 | 0.01 |
| AAACAG | 4   | 0.00 | -    | 2   | 0.00 | 0.00 | 8   | 0.00 | 0.00 | 3  | 0.00 | -    | 4   | 0.00 | 0.00 |
| AAACAT | 3   | 0.00 | -    | 1   | 0.00 | -    | 9   | 0.00 | -    | 4  | 0.00 | -    | 5   | 0.00 | -    |
| AAACCC | 15  | 0.00 | 0.01 | 52  | 0.02 | 0.00 | 3   | 0.00 | 0.00 | 45 | 0.01 | 0.01 | 4   | 0.00 | 0.00 |
| AAACCT | -   | -    | -    | -   | -    | -    | 6   | 0.00 | 0.00 | 3  | 0.00 | 0.00 | 1   | 0.00 | -    |
| AAACGC | -   | -    | -    | -   | -    | -    | 3   | 0.00 | 0.00 | 1  | 0.00 | -    | -   | -    | -    |
| AAACGG | -   | -    | -    | -   | -    | -    | -   | -    | -    | 1  | 0.00 | 0.00 | 1   | 0.00 | -    |
| AAACTC | 2   | 0.00 | -    | 2   | 0.00 | -    | 1   | 0.00 | -    | 3  | 0.00 | -    | 3   | 0.00 | -    |
| AAACTG | 1   | 0.00 | 0.00 | 2   | 0.00 | -    | 5   | 0.00 | 0.00 | 9  | 0.00 | 0.00 | 1   | 0.00 | -    |
| AAACTT | -   | -    | -    | 1   | 0.00 | -    | -   | -    | -    | -  | -    | -    | -   | -    | -    |
| AAAGAC | 1   | 0.00 | -    | -   | -    | -    | 1   | 0.00 | -    | -  | -    | -    | -   | -    | -    |
| AAAGAG | 6   | 0.00 | -    | 7   | 0.00 | 0.00 | 14  | 0.00 | 0.00 | 17 | 0.00 | 0.00 | 54  | 0.01 | 0.03 |
| AAAGAT | 14  | 0.00 | -    | 15  | 0.00 | -    | 5   | 0.00 | 0.00 | 4  | 0.00 | -    | 3   | 0.00 | -    |
| AAAGCC | -   | -    | -    | 1   | 0.00 | 0.00 | 3   | 0.00 | -    | 1  | 0.00 | 0.00 | 1   | 0.00 | 0.00 |
| AAAGCG | -   | -    | -    | -   | -    | -    | 1   | 0.00 | -    | -  | -    | -    | -   | -    | -    |
| AAAGCT | -   | -    | -    | -   | -    | -    | 1   | 0.00 | -    | -  | -    | -    | -   | -    | -    |
| AAAGGC | -   | -    | -    | -   | -    | -    | 1   | 0.00 | -    | 3  | 0.00 | -    | 2   | 0.00 | -    |
| AAAGGG | 1   | 0.00 | -    | -   | -    | -    | 3   | 0.00 | 0.00 | 4  | 0.00 | 0.00 | 3   | 0.00 | 0.00 |
| AAAGGT | -   | -    | -    | -   | -    | -    | 1   | 0.00 | 0.00 | -  | -    | -    | -   | -    | -    |
| AAAGTC | -   | -    | -    | 2   | 0.00 | -    | -   | -    | -    | 1  | 0.00 | -    | 96  | 0.02 | -    |
| AAAGTG | -   | -    | -    | 1   | 0.00 | -    | 3   | 0.00 | 0.00 | 4  | 0.00 | -    | -   | -    | -    |
| AAAGTT | -   | -    | -    | 1   | 0.00 | -    | -   | -    | -    | -  | -    | -    | -   | -    | -    |
| AAATAC | 4   | 0.00 | -    | -   | -    | -    | 1   | 0.00 | -    | 1  | 0.00 | -    | 6   | 0.00 | -    |
| AAATAG | 2   | 0.00 | -    | 7   | 0.00 | 0.00 | 4   | 0.00 | -    | 2  | 0.00 | 0.00 | 1   | 0.00 | -    |
| AAATAT | 14  | 0.00 | -    | 14  | 0.00 | -    | 19  | 0.00 | -    | 19 | 0.00 | -    | 44  | 0.01 | -    |
| AAATCC | 8   | 0.00 | -    | 6   | 0.00 | 0.00 | 3   | 0.00 | -    | 2  | 0.00 | -    | 4   | 0.00 | -    |
| AAATCG | -   | -    | -    | -   | -    | -    | 1   | 0.00 | -    | 2  | 0.00 | -    | -   | -    | -    |
| AAATCT | 2   | 0.00 | -    | 2   | 0.00 | -    | 2   | 0.00 | 0.00 | 6  | 0.00 | -    | 1   | 0.00 | -    |
| AAATGC | 4   | 0.00 | -    | 2   | 0.00 | -    | 3   | 0.00 | -    | 1  | 0.00 | -    | -   | -    | -    |
| AAATGG | 2   | 0.00 | 0.00 | 6   | 0.00 | 0.00 | 10  | 0.00 | 0.01 | 13 | 0.00 | 0.01 | 5   | 0.00 | -    |
| AAATGT | 2   | 0.00 | -    | -   | -    | -    | -   | -    | -    | 1  | 0.00 | -    | 2   | 0.00 | -    |
| AAATTC | 8   | 0.00 | 0.00 | 19  | 0.01 | 0.00 | 10  | 0.00 | 0.01 | 18 | 0.00 | 0.01 | 11  | 0.00 | 0.00 |
| AAATTG | 5   | 0.00 | -    | 12  | 0.00 | -    | 40  | 0.01 | 0.00 | 27 | 0.01 | -    | 11  | 0.00 | -    |
| AAATTT | 2   | 0.00 | -    | -   | -    | -    | 2   | 0.00 | -    | 9  | 0.00 | -    | 7   | 0.00 | -    |
| AACAAG | 5   | 0.00 | 0.01 | 10  | 0.00 | 0.01 | 8   | 0.00 | 0.01 | 10 | 0.00 | 0.01 | 3   | 0.00 | -    |
| AACACC | 5   | 0.00 | 0.01 | 6   | 0.00 | 0.01 | 4   | 0.00 | 0.00 | 8  | 0.00 | 0.01 | 13  | 0.00 | 0.01 |
| AACACG | -   | -    | -    | -   | -    | -    | 2   | 0.00 | 0.00 | 2  | 0.00 | 0.00 | -   | -    | -    |
| AACACT | -   | -    | -    | 1   | 0.00 | -    | -   | -    | -    | 3  | 0.00 | -    | 2   | 0.00 | -    |
| AACAGC | 4   | 0.00 | 0.01 | 5   | 0.00 | 0.01 | 1   | 0.00 | 0.00 | 15 | 0.00 | 0.03 | 1   | 0.00 | 0.00 |
| AACAGG | 1   | 0.00 | -    | -   | -    | -    | 1   | 0.00 | 0.00 | 1  | 0.00 | -    | -   | -    | -    |
| AACAGT | 1   | 0.00 | -    | 1   | 0.00 | 0.00 | 1   | 0.00 | 0.00 | 2  | 0.00 | -    | -   | -    | -    |
| AACATC | -   | -    | -    | 4   | 0.00 | 0.00 | 9   | 0.00 | 0.02 | 8  | 0.00 | 0.01 | 4   | 0.00 | 0.01 |
| AACATG | 3   | 0.00 | 0.00 | 3   | 0.00 | -    | 5   | 0.00 | 0.01 | 8  | 0.00 | 0.01 | 5   | 0.00 | 0.01 |
| AACCAC | 13  | 0.00 | 0.01 | 2   | 0.00 | 0.00 | 2   | 0.00 | 0.00 | 5  | 0.00 | -    | 4   | 0.00 | 0.01 |
| AACCAG | 4   | 0.00 | 0.01 | 6   | 0.00 | 0.02 | 3   | 0.00 | 0.01 | 15 | 0.00 | 0.02 | 3   | 0.00 | 0.01 |
| AACCAT | 1   | 0.00 | 0.00 | 4   | 0.00 | -    | 1   | 0.00 | -    | 1  | 0.00 | 0.00 | 1   | 0.00 | 0.00 |



|        |    |      |      |    |      |      |    |      |      |     |      |      |    |      |      |
|--------|----|------|------|----|------|------|----|------|------|-----|------|------|----|------|------|
| AATACT | 1  | 0.00 | -    | 2  | 0.00 | -    | -  | -    | -    | -   | -    | -    | 3  | 0.00 | -    |
| AATAGC | 2  | 0.00 | -    | 4  | 0.00 | -    | 2  | 0.00 | -    | 5   | 0.00 | 0.00 | 2  | 0.00 | 0.00 |
| AATAGG | -  | -    | -    | 4  | 0.00 | -    | 6  | 0.00 | -    | 2   | 0.00 | -    | 13 | 0.00 | -    |
| AATAGT | 4  | 0.00 | 0.00 | 6  | 0.00 | 0.00 | 8  | 0.00 | 0.00 | 4   | 0.00 | -    | 2  | 0.00 | -    |
| AATATC | 1  | 0.00 | -    | 5  | 0.00 | -    | 3  | 0.00 | 0.00 | 181 | 0.04 | -    | -  | -    | -    |
| AATATG | 1  | 0.00 | -    | 2  | 0.00 | 0.00 | 8  | 0.00 | 0.00 | 13  | 0.00 | 0.01 | 5  | 0.00 | 0.00 |
| AATATT | 4  | 0.00 | -    | 6  | 0.00 | -    | 3  | 0.00 | -    | 10  | 0.00 | -    | 47 | 0.01 | -    |
| AATCAC | 5  | 0.00 | 0.00 | 10 | 0.00 | 0.01 | 5  | 0.00 | 0.00 | 13  | 0.00 | 0.01 | 3  | 0.00 | 0.00 |
| AATCAG | 4  | 0.00 | 0.00 | 7  | 0.00 | 0.01 | 7  | 0.00 | 0.01 | 7   | 0.00 | 0.00 | 4  | 0.00 | 0.01 |
| AATCAT | 16 | 0.00 | 0.01 | 17 | 0.00 | 0.01 | 13 | 0.00 | 0.00 | 4   | 0.00 | -    | 9  | 0.00 | -    |
| AATCCC | -  | -    | -    | 2  | 0.00 | -    | 4  | 0.00 | 0.00 | 13  | 0.00 | -    | 3  | 0.00 | 0.00 |
| AATCCG | -  | -    | -    | -  | -    | -    | 1  | 0.00 | -    | 2   | 0.00 | -    | 1  | 0.00 | -    |
| AATCCT | 3  | 0.00 | 0.00 | 10 | 0.00 | 0.00 | -  | -    | -    | 2   | 0.00 | -    | 1  | 0.00 | -    |
| AATCGC | 1  | 0.00 | -    | -  | -    | -    | -  | -    | -    | 3   | 0.00 | 0.00 | 1  | 0.00 | -    |
| AATCGG | -  | -    | -    | 1  | 0.00 | -    | 1  | 0.00 | 0.00 | 10  | 0.00 | 0.01 | 2  | 0.00 | -    |
| AATCGT | -  | -    | -    | -  | -    | -    | -  | -    | -    | 1   | 0.00 | -    | -  | -    | -    |
| AATCTC | 1  | 0.00 | -    | 5  | 0.00 | 0.00 | 6  | 0.00 | 0.01 | 9   | 0.00 | 0.00 | 2  | 0.00 | -    |
| AATCTG | -  | -    | -    | 1  | 0.00 | -    | 2  | 0.00 | 0.00 | 10  | 0.00 | 0.00 | 1  | 0.00 | 0.00 |
| AATCTT | 6  | 0.00 | -    | 17 | 0.00 | -    | 2  | 0.00 | -    | 4   | 0.00 | -    | 2  | 0.00 | -    |
| AATGAC | 1  | 0.00 | -    | 2  | 0.00 | -    | 4  | 0.00 | 0.00 | 2   | 0.00 | -    | 2  | 0.00 | -    |
| AATGAG | 1  | 0.00 | -    | 4  | 0.00 | 0.00 | 6  | 0.00 | 0.00 | 8   | 0.00 | 0.00 | 5  | 0.00 | -    |
| AATGAT | 4  | 0.00 | -    | 8  | 0.00 | -    | 7  | 0.00 | 0.00 | 7   | 0.00 | 0.00 | 3  | 0.00 | -    |
| AATGCC | -  | -    | -    | 2  | 0.00 | -    | 2  | 0.00 | 0.00 | 4   | 0.00 | -    | -  | -    | -    |
| AATGCC | -  | -    | -    | -  | -    | -    | 1  | 0.00 | -    | 2   | 0.00 | -    | -  | -    | -    |
| AATGCT | 2  | 0.00 | 0.00 | 6  | 0.00 | 0.00 | 1  | 0.00 | -    | 5   | 0.00 | -    | -  | -    | -    |
| AATGGC | -  | -    | -    | 6  | 0.00 | 0.00 | 1  | 0.00 | -    | 3   | 0.00 | 0.01 | 1  | 0.00 | -    |
| AATGGG | 1  | 0.00 | -    | 2  | 0.00 | 0.00 | -  | -    | -    | 8   | 0.00 | 0.00 | 2  | 0.00 | 0.01 |
| AATGGT | 1  | 0.00 | -    | 7  | 0.00 | 0.01 | 4  | 0.00 | 0.00 | 3   | 0.00 | 0.00 | -  | -    | -    |
| AATGTC | -  | -    | -    | -  | -    | -    | 1  | 0.00 | -    | -   | -    | -    | -  | -    | -    |
| AATGTG | 1  | 0.00 | -    | 4  | 0.00 | -    | 8  | 0.00 | 0.00 | 7   | 0.00 | -    | 2  | 0.00 | 0.00 |
| AATGTT | 4  | 0.00 | 0.00 | -  | -    | -    | 2  | 0.00 | -    | 1   | 0.00 | -    | 5  | 0.00 | -    |
| AATTAC | 3  | 0.00 | -    | 6  | 0.00 | -    | 2  | 0.00 | 0.00 | 2   | 0.00 | -    | 1  | 0.00 | -    |
| AATTAG | 1  | 0.00 | -    | 5  | 0.00 | 0.00 | 3  | 0.00 | -    | 9   | 0.00 | -    | 2  | 0.00 | -    |
| AATTAT | 1  | 0.00 | -    | 7  | 0.00 | 0.00 | 4  | 0.00 | -    | 3   | 0.00 | -    | 10 | 0.00 | -    |
| AATTCC | 1  | 0.00 | -    | 3  | 0.00 | -    | 6  | 0.00 | 0.00 | 9   | 0.00 | 0.01 | 3  | 0.00 | 0.01 |
| AATTGC | -  | -    | -    | 1  | 0.00 | -    | -  | -    | -    | 1   | 0.00 | -    | 1  | 0.00 | -    |
| ACACAG | 1  | 0.00 | -    | -  | -    | -    | 1  | 0.00 | -    | 5   | 0.00 | -    | 1  | 0.00 | -    |
| ACACCC | -  | -    | -    | 1  | 0.00 | -    | 1  | 0.00 | 0.00 | 7   | 0.00 | 0.00 | 3  | 0.00 | -    |
| ACACCG | -  | -    | -    | -  | -    | -    | 1  | 0.00 | -    | 4   | 0.00 | 0.00 | 1  | 0.00 | -    |
| ACACCT | 22 | 0.00 | -    | 1  | 0.00 | -    | -  | -    | -    | 3   | 0.00 | 0.00 | -  | -    | -    |
| ACACGC | -  | -    | -    | 1  | 0.00 | 0.00 | -  | -    | -    | 7   | 0.00 | -    | 4  | 0.00 | -    |
| ACACGG | -  | -    | -    | 2  | 0.00 | -    | 1  | 0.00 | -    | -   | -    | -    | 2  | 0.00 | -    |
| ACACTC | -  | -    | -    | 5  | 0.00 | 0.00 | 3  | 0.00 | -    | 11  | 0.00 | 0.01 | 4  | 0.00 | -    |
| CACTG  | -  | -    | -    | 2  | 0.00 | -    | 1  | 0.00 | -    | -   | -    | -    | -  | -    | -    |
| ACAGAG | -  | -    | -    | -  | -    | -    | 3  | 0.00 | 0.00 | 5   | 0.00 | -    | 3  | 0.00 | 0.00 |
| ACAGCC | -  | -    | -    | 1  | 0.00 | 0.00 | 1  | 0.00 | 0.00 | -   | -    | -    | 3  | 0.00 | 0.01 |
| ACAGGC | -  | -    | -    | 2  | 0.00 | 0.00 | -  | -    | -    | 2   | 0.00 | 0.01 | -  | -    | -    |
| ACAGGG | -  | -    | -    | 1  | 0.00 | 0.00 | -  | -    | -    | -   | -    | -    | 1  | 0.00 | 0.00 |
| ACAGGT | -  | -    | -    | -  | -    | -    | 1  | 0.00 | -    | -   | -    | -    | -  | -    | -    |
| ACAGTC | 1  | 0.00 | -    | 2  | 0.00 | -    | -  | -    | -    | 1   | 0.00 | -    | -  | -    | -    |
| ACAGTG | -  | -    | -    | 1  | 0.00 | -    | -  | -    | -    | 4   | 0.00 | -    | 2  | 0.00 | 0.00 |
| ACCACG | -  | -    | -    | -  | -    | -    | 1  | 0.00 | -    | 3   | 0.00 | -    | 2  | 0.00 | 0.01 |
| ACCAGC | 2  | 0.00 | 0.00 | 3  | 0.00 | 0.00 | -  | -    | -    | 12  | 0.00 | 0.01 | 2  | 0.00 | 0.01 |
| ACCAGG | -  | -    | -    | -  | -    | -    | 2  | 0.00 | -    | 1   | 0.00 | -    | -  | -    | -    |
| ACCCAG | -  | -    | -    | -  | -    | -    | -  | -    | -    | 2   | 0.00 | -    | 1  | 0.00 | 0.00 |
| ACCCCC | 2  | 0.00 | -    | -  | -    | -    | 1  | 0.00 | -    | 5   | 0.00 | 0.00 | -  | -    | -    |
| ACCCGG | -  | -    | -    | -  | -    | -    | -  | -    | -    | -   | -    | -    | 1  | 0.00 | -    |
| ACCCGT | -  | -    | -    | -  | -    | -    | -  | -    | -    | 1   | 0.00 | -    | -  | -    | -    |
| ACCCTC | -  | -    | -    | -  | -    | -    | 1  | 0.00 | 0.00 | 24  | 0.01 | 0.01 | 11 | 0.00 | 0.00 |
| ACCCTG | -  | -    | -    | -  | -    | -    | -  | -    | -    | 1   | 0.00 | 0.00 | -  | -    | -    |

|        |    |      |      |   |      |      |    |      |      |    |      |      |   |      |      |
|--------|----|------|------|---|------|------|----|------|------|----|------|------|---|------|------|
| ACCGCG | -  | -    | -    | 1 | 0.00 | -    | -  | -    | -    | -  | -    | -    | - | -    | -    |
| ACCGCT | -  | -    | -    | - | -    | -    | -  | -    | -    | 1  | 0.00 | -    | - | -    | -    |
| ACCGGC | -  | -    | -    | 2 | 0.00 | 0.00 | -  | -    | -    | 2  | 0.00 | 0.00 | 2 | 0.00 | 0.01 |
| ACCGGT | -  | -    | -    | 1 | 0.00 | -    | -  | -    | -    | -  | -    | -    | - | -    | -    |
| ACCGTC | -  | -    | -    | 1 | 0.00 | -    | -  | -    | -    | -  | -    | -    | - | -    | -    |
| ACCTCC | 1  | 0.00 | 0.00 | 1 | 0.00 | 0.00 | 4  | 0.00 | 0.01 | 20 | 0.00 | 0.01 | 2 | 0.00 | 0.01 |
| ACCTCG | -  | -    | -    | - | -    | -    | -  | -    | -    | 1  | 0.00 | -    | - | -    | -    |
| ACCTCT | -  | -    | -    | - | -    | -    | -  | -    | -    | 4  | 0.00 | 0.00 | - | -    | -    |
| ACCTGC | 1  | 0.00 | 0.00 | - | -    | -    | 1  | 0.00 | 0.00 | 2  | 0.00 | 0.00 | 3 | 0.00 | -    |
| ACCTGG | -  | -    | -    | - | -    | -    | -  | -    | -    | 2  | 0.00 | 0.00 | 2 | 0.00 | 0.00 |
| ACGAGC | -  | -    | -    | - | -    | -    | -  | -    | -    | 2  | 0.00 | -    | - | -    | -    |
| ACGAGG | -  | -    | -    | 1 | 0.00 | 0.00 | 2  | 0.00 | 0.00 | -  | -    | -    | - | -    | -    |
| ACGCC  | -  | -    | -    | - | -    | -    | -  | -    | -    | 7  | 0.00 | -    | - | -    | -    |
| ACGCCG | -  | -    | -    | - | -    | -    | -  | -    | -    | 1  | 0.00 | 0.00 | - | -    | -    |
| ACGCGC | -  | -    | -    | - | -    | -    | -  | -    | -    | 1  | 0.00 | -    | - | -    | -    |
| ACGGAG | -  | -    | -    | - | -    | -    | -  | -    | -    | 4  | 0.00 | -    | - | -    | -    |
| ACGGCC | -  | -    | -    | - | -    | -    | -  | -    | -    | -  | -    | -    | 1 | 0.00 | -    |
| ACGGCG | -  | -    | -    | - | -    | -    | -  | -    | -    | 5  | 0.00 | 0.01 | 1 | 0.00 | 0.00 |
| ACGGGC | -  | -    | -    | - | -    | -    | 1  | 0.00 | -    | 3  | 0.00 | 0.00 | - | -    | -    |
| ACGGGG | -  | -    | -    | - | -    | -    | 1  | 0.00 | 0.00 | -  | -    | -    | - | -    | -    |
| ACTACC | -  | -    | -    | - | -    | -    | 1  | 0.00 | -    | 2  | 0.00 | 0.00 | - | -    | -    |
| ACTAGC | -  | -    | -    | - | -    | -    | 1  | 0.00 | 0.00 | 4  | 0.00 | 0.00 | - | -    | -    |
| ACTAGG | 1  | 0.00 | -    | - | -    | -    | -  | -    | -    | 1  | 0.00 | -    | - | -    | -    |
| ACTAGT | -  | -    | -    | 4 | 0.00 | 0.00 | -  | -    | -    | 2  | 0.00 | -    | - | -    | -    |
| ACTCAG | -  | -    | -    | 1 | 0.00 | 0.00 | 3  | 0.00 | 0.01 | 4  | 0.00 | -    | 1 | 0.00 | 0.01 |
| ACTCCC | -  | -    | -    | - | -    | -    | 1  | 0.00 | 0.00 | -  | -    | -    | 2 | 0.00 | 0.00 |
| ACTCCG | -  | -    | -    | - | -    | -    | 1  | 0.00 | 0.00 | 5  | 0.00 | 0.00 | 2 | 0.00 | -    |
| ACTCCT | -  | -    | -    | 2 | 0.00 | -    | -  | -    | -    | 1  | 0.00 | -    | 1 | 0.00 | -    |
| ACTCGG | -  | -    | -    | - | -    | -    | -  | -    | -    | -  | -    | -    | 1 | 0.00 | 0.00 |
| ACTCTC | 6  | 0.00 | 0.00 | 3 | 0.00 | 0.00 | 9  | 0.00 | -    | 45 | 0.01 | 0.01 | 4 | 0.00 | 0.01 |
| ACTCTG | -  | -    | -    | - | -    | -    | 2  | 0.00 | 0.00 | -  | -    | -    | - | -    | -    |
| ACTGAG | -  | -    | -    | 1 | 0.00 | 0.00 | 1  | 0.00 | 0.00 | 6  | 0.00 | 0.01 | 1 | 0.00 | -    |
| ACTGCC | -  | -    | -    | 1 | 0.00 | -    | -  | -    | -    | 5  | 0.00 | 0.00 | - | -    | -    |
| ACTGCG | -  | -    | -    | - | -    | -    | 1  | 0.00 | 0.00 | 2  | 0.00 | 0.00 | 1 | 0.00 | -    |
| ACTGCT | 2  | 0.00 | 0.00 | - | -    | -    | 1  | 0.00 | -    | 8  | 0.00 | 0.00 | - | -    | -    |
| ACTGGC | -  | -    | -    | 1 | 0.00 | 0.00 | -  | -    | -    | 2  | 0.00 | 0.00 | - | -    | -    |
| ACTGGT | -  | -    | -    | - | -    | -    | -  | -    | -    | 3  | 0.00 | 0.00 | - | -    | -    |
| AGAGCC | 1  | 0.00 | -    | - | -    | -    | -  | -    | -    | 6  | 0.00 | 0.01 | 1 | 0.00 | 0.00 |
| AGAGCG | -  | -    | -    | - | -    | -    | -  | -    | -    | 6  | 0.00 | -    | - | -    | -    |
| AGAGCT | -  | -    | -    | 1 | 0.00 | -    | -  | -    | -    | -  | -    | -    | - | -    | -    |
| AGAGGC | -  | -    | -    | 1 | 0.00 | -    | 1  | 0.00 | -    | 5  | 0.00 | 0.00 | 1 | 0.00 | 0.00 |
| AGAGGG | 17 | 0.00 | -    | 5 | 0.00 | 0.00 | 29 | 0.01 | 0.00 | 15 | 0.00 | 0.01 | 3 | 0.00 | 0.00 |
| AGCAGG | 1  | 0.00 | -    | - | -    | -    | 5  | 0.00 | 0.01 | 4  | 0.00 | 0.00 | - | -    | -    |
| AGCCCC | -  | -    | -    | - | -    | -    | -  | -    | -    | 2  | 0.00 | 0.00 | - | -    | -    |
| AGCCCG | -  | -    | -    | - | -    | -    | -  | -    | -    | -  | -    | -    | 1 | 0.00 | -    |
| AGCCGC | -  | -    | -    | - | -    | -    | 1  | 0.00 | 0.00 | -  | -    | -    | - | -    | -    |
| AGCCTC | 1  | 0.00 | 0.00 | 1 | 0.00 | -    | 2  | 0.00 | -    | 6  | 0.00 | 0.00 | - | -    | -    |
| AGCCTG | -  | -    | -    | 1 | 0.00 | 0.00 | 1  | 0.00 | -    | 5  | 0.00 | 0.01 | 2 | 0.00 | 0.01 |
| AGCGGC | -  | -    | -    | - | -    | -    | 1  | 0.00 | -    | -  | -    | -    | - | -    | -    |
| AGCGGG | 1  | 0.00 | -    | 1 | 0.00 | 0.00 | -  | -    | -    | -  | -    | -    | - | -    | -    |
| AGTCC  | 2  | 0.00 | 0.00 | 1 | 0.00 | -    | 1  | 0.00 | 0.00 | 3  | 0.00 | 0.00 | 1 | 0.00 | 0.00 |
| AGGCC  | -  | -    | -    | 1 | 0.00 | 0.00 | -  | -    | -    | 2  | 0.00 | -    | 1 | 0.00 | 0.00 |
| AGGCGG | -  | -    | -    | - | -    | -    | 1  | 0.00 | 0.00 | 2  | 0.00 | 0.00 | - | -    | -    |
| AGGGCG | -  | -    | -    | - | -    | -    | -  | -    | -    | 1  | 0.00 | -    | - | -    | -    |
| AGGGC  | -  | -    | -    | - | -    | -    | 2  | 0.00 | -    | -  | -    | -    | 3 | 0.00 | 0.01 |
| AGGGGG | 2  | 0.00 | -    | - | -    | -    | 2  | 0.00 | 0.00 | 2  | 0.00 | -    | 1 | 0.00 | -    |
| ATACAC | 1  | 0.00 | -    | 3 | 0.00 | -    | 2  | 0.00 | -    | 7  | 0.00 | -    | 1 | 0.00 | -    |
| ATACAG | -  | -    | -    | - | -    | -    | -  | -    | -    | 1  | 0.00 | -    | - | -    | -    |

|           |        |       |      |        |       |      |        |       |      |        |      |      |        |       |      |
|-----------|--------|-------|------|--------|-------|------|--------|-------|------|--------|------|------|--------|-------|------|
| ATACCC    | -      | -     | -    | 2      | 0.00  | 0.00 | 2      | 0.00  | -    | -      | -    | -    | -      | -     | -    |
| ATACCG    | 1      | 0.00  | -    | -      | -     | -    | -      | -     | -    | -      | -    | -    | -      | -     | -    |
| ATACGT    | -      | -     | -    | -      | -     | -    | -      | -     | -    | -      | -    | 1    | 0.00   | -     | -    |
| ATACTC    | -      | -     | -    | -      | -     | -    | -      | -     | -    | 2      | 0.00 | -    | -      | -     | -    |
| ATACTG    | -      | -     | -    | -      | -     | -    | -      | -     | -    | 2      | 0.00 | -    | -      | -     | -    |
| ATAGAC    | -      | -     | -    | 1      | 0.00  | 0.00 | 2      | 0.00  | -    | 2      | 0.00 | -    | 1      | 0.00  | -    |
| ATAGAG    | 3      | 0.00  | 0.00 | 8      | 0.00  | 0.00 | 17     | 0.00  | -    | 4      | 0.00 | -    | 4      | 0.00  | 0.01 |
| ATAGCC    | 2      | 0.00  | -    | 3      | 0.00  | -    | 1      | 0.00  | 0.00 | 1      | 0.00 | -    | -      | -     | -    |
| ATAGGC    | 1      | 0.00  | -    | -      | -     | -    | -      | -     | -    | 3      | 0.00 | -    | -      | -     | -    |
| ATAGGG    | -      | -     | -    | -      | -     | -    | 1      | 0.00  | 0.00 | -      | -    | -    | 3      | 0.00  | 0.00 |
| ATAGTC    | -      | -     | -    | 1      | 0.00  | -    | 1      | 0.00  | -    | 1      | 0.00 | -    | -      | -     | -    |
| ATAGTG    | 4      | 0.00  | 0.00 | 2      | 0.00  | -    | 3      | 0.00  | 0.00 | 1      | 0.00 | -    | -      | -     | -    |
| ATATAC    | 2      | 0.00  | -    | 13     | 0.00  | -    | 11     | 0.00  | -    | 6      | 0.00 | -    | 13     | 0.00  | -    |
| ATATAG    | 23     | 0.00  | -    | 36     | 0.01  | -    | 7      | 0.00  | -    | 72     | 0.02 | -    | 8      | 0.00  | 0.00 |
| ATATCC    | -      | -     | -    | 3      | 0.00  | -    | -      | -     | -    | 7      | 0.00 | -    | -      | -     | -    |
| ATCACC    | 2      | 0.00  | 0.00 | 7      | 0.00  | 0.01 | 11     | 0.00  | 0.01 | 21     | 0.00 | 0.03 | 5      | 0.00  | 0.00 |
| ATCACG    | -      | -     | -    | 1      | 0.00  | 0.00 | 1      | 0.00  | 0.00 | 6      | 0.00 | 0.00 | 1      | 0.00  | 0.00 |
| ATCAGC    | -      | -     | -    | -      | -     | -    | 2      | 0.00  | -    | 9      | 0.00 | 0.00 | 3      | 0.00  | 0.01 |
| ATCAGG    | -      | -     | -    | -      | -     | -    | -      | -     | -    | -      | -    | -    | 1      | 0.00  | 0.00 |
| ATCATG    | 2      | 0.00  | -    | 1      | 0.00  | 0.00 | 1      | 0.00  | 0.00 | 1      | 0.00 | -    | -      | -     | -    |
| ATCCAC    | 1      | 0.00  | 0.00 | 1      | 0.00  | 0.00 | 2      | 0.00  | 0.00 | 5      | 0.00 | 0.00 | 3      | 0.00  | 0.00 |
| ATCCCC    | -      | -     | -    | -      | -     | -    | 1      | 0.00  | -    | -      | -    | -    | 1      | 0.00  | -    |
| ATCCGC    | -      | -     | -    | 1      | 0.00  | -    | -      | -     | -    | 2      | 0.00 | -    | 1      | 0.00  | 0.00 |
| ATCCTC    | 2      | 0.00  | 0.00 | 3      | 0.00  | 0.00 | 5      | 0.00  | 0.01 | 19     | 0.00 | 0.02 | 3      | 0.00  | 0.00 |
| ATCGAC    | 1      | 0.00  | -    | -      | -     | -    | -      | -     | -    | -      | -    | -    | 1      | 0.00  | -    |
| ATCGCC    | 1      | 0.00  | -    | -      | -     | -    | 1      | 0.00  | -    | 2      | 0.00 | -    | -      | -     | -    |
| ATCGGC    | 1      | 0.00  | 0.00 | -      | -     | -    | -      | -     | -    | 2      | 0.00 | 0.00 | -      | -     | -    |
| ATCGTC    | -      | -     | -    | 2      | 0.00  | 0.00 | 2      | 0.00  | 0.00 | 1      | 0.00 | 0.00 | -      | -     | -    |
| ATCTAC    | -      | -     | -    | 1      | 0.00  | -    | -      | -     | -    | 5      | 0.00 | -    | 2      | 0.00  | -    |
| ATCTCC    | -      | -     | -    | 4      | 0.00  | 0.00 | 5      | 0.00  | 0.00 | 13     | 0.00 | 0.02 | 4      | 0.00  | 0.00 |
| ATCTCG    | -      | -     | -    | -      | -     | -    | -      | -     | -    | 1      | 0.00 | -    | -      | -     | -    |
| ATCTGC    | 1      | 0.00  | -    | 3      | 0.00  | 0.00 | 1      | 0.00  | -    | 3      | 0.00 | 0.00 | -      | -     | -    |
| ATCTGG    | -      | -     | -    | -      | -     | -    | -      | -     | -    | 2      | 0.00 | -    | -      | -     | -    |
| ATGACC    | 3      | 0.00  | 0.01 | 2      | 0.00  | 0.00 | 2      | 0.00  | 0.00 | 1      | 0.00 | -    | 3      | 0.00  | 0.01 |
| ATGAGC    | -      | -     | -    | 1      | 0.00  | 0.00 | 1      | 0.00  | -    | 3      | 0.00 | -    | 1      | 0.00  | -    |
| ATGCCC    | -      | -     | -    | -      | -     | -    | -      | -     | -    | 3      | 0.00 | -    | 1      | 0.00  | -    |
| ATGGCC    | -      | -     | -    | -      | -     | -    | -      | -     | -    | 1      | 0.00 | -    | -      | -     | -    |
| ATGTAC    | -      | -     | -    | -      | -     | -    | 3      | 0.00  | -    | -      | -    | -    | -      | -     | -    |
| ATGTCC    | 1      | 0.00  | -    | 2      | 0.00  | -    | 3      | 0.00  | 0.00 | -      | -    | -    | -      | -     | -    |
| ATGTGC    | -      | -     | -    | 1      | 0.00  | -    | 2      | 0.00  | -    | 2      | 0.00 | -    | 1      | 0.00  | -    |
| CCCCCG    | -      | -     | -    | -      | -     | -    | 1      | 0.00  | -    | -      | -    | -    | -      | -     | -    |
| CCGGCG    | -      | -     | -    | -      | -     | -    | -      | -     | -    | 1      | 0.00 | 0.00 | -      | -     | -    |
| Sub-total | 633    | 0.03  | 0.11 | 857    | 0.10  | 0.14 | 988    | 0.10  | 0.30 | 1,749  | 0.20 | 0.59 | 1,178  | 0.13  | 0.36 |
| Total     | 61,402 | 12.43 | 5.10 | 47,604 | 13.49 | 8.27 | 49,235 | 11.79 | 6.15 | 45,428 | 9.83 | 7.81 | 57,696 | 10.91 | 5.37 |



**Supplemental Table S8.** Statistics of candidate genes predicted by MAKER and Augustus 3.0.2.

|         |                     | MAKER      | Augustus   | Integrated |
|---------|---------------------|------------|------------|------------|
| Total   | Number of sequences | 28,372     | 14,334     | 42,706     |
|         | Total length (bp)   | 26,446,191 | 21,518,826 | 47,965,017 |
|         | Average length (bp) | 932        | 1,501      | 1,123      |
|         | Max length (bp)     | 14,295     | 15,417     | 15,417     |
|         | Min length (bp)     | 150        | 153        | 150        |
|         | N50 length (bp)     | 1,299      | 2,073      | 1,548      |
|         | A                   | 7,911,463  | 6,470,083  | 14,381,546 |
|         | T                   | 7,552,592  | 6,067,898  | 13,620,490 |
|         | G                   | 6,021,713  | 4,975,944  | 10,997,657 |
|         | C                   | 4,958,722  | 3,997,181  | 8,955,903  |
|         | N                   | 1,701      | 7,720      | 9,421      |
|         | Total (ATGC)        | 26,444,490 | 21,511,106 | 47,955,596 |
|         | GC% (GC/ATGC)       | 41.5       | 41.7       | 41.6       |
| ≥500 bp | Number of sequences | 18,459     | 12,238     | 30,697     |
|         | Total length (bp)   | 23,330,754 | 20,762,572 | 44,093,326 |
|         | Average length (bp) | 1,263      | 1,696      | 1,436      |
| ≥1 kb   | Number of sequences | 9,809      | 8,184      | 17,993     |
|         | Total length (bp)   | 17,026,347 | 17,768,297 | 34,794,644 |
|         | Average length (bp) | 1,735      | 2,171      | 1,933      |
| ≥5 kb   | Number of sequences | 106        | 221        | 327        |
|         | Total length (bp)   | 663,291    | 1,312,777  | 1,976,068  |
|         | Average length (bp) | 6,257      | 5,940      | 6,043      |

**Supplementary Table S9.** Numbers of putative tRNA and rRNA encoding genes identified in TSUd\_r1.1.

**tRNA**

| Encode gene          | <i>Trifolium subterraneum</i> (TSUd_r1.1) | Red clover (v2.1) | <i>M. truncatula</i> (4.0v1) | <i>L. japonicus</i> (Lj3.0) | Common bean (v1.0) |
|----------------------|-------------------------------------------|-------------------|------------------------------|-----------------------------|--------------------|
| Ala                  | 52                                        | 59                | 58                           | 40                          | 41                 |
| Arg                  | 56                                        | 53                | 49                           | 54                          | 43                 |
| Asn                  | 36                                        | 31                | 51                           | 28                          | 22                 |
| Asp                  | 47                                        | 35                | 43                           | 32                          | 30                 |
| Cys                  | 22                                        | 26                | 18                           | 76                          | 16                 |
| Gln                  | 25                                        | 26                | 27                           | 23                          | 21                 |
| Glu                  | 40                                        | 45                | 37                           | 40                          | 28                 |
| Gly                  | 65                                        | 61                | 63                           | 48                          | 51                 |
| His                  | 19                                        | 20                | 24                           | 19                          | 15                 |
| Ile                  | 40                                        | 48                | 36                           | 29                          | 30                 |
| Leu                  | 84                                        | 71                | 72                           | 57                          | 56                 |
| Lys                  | 55                                        | 48                | 46                           | 41                          | 43                 |
| Met                  | 49                                        | 45                | 62                           | 48                          | 39                 |
| Phe                  | 27                                        | 30                | 27                           | 22                          | 28                 |
| Pro                  | 40                                        | 40                | 46                           | 46                          | 48                 |
| Ser                  | 63                                        | 62                | 60                           | 44                          | 50                 |
| Thr                  | 39                                        | 40                | 39                           | 36                          | 28                 |
| Trp                  | 20                                        | 21                | 22                           | 21                          | 16                 |
| Tyr                  | 27                                        | 26                | 19                           | 22                          | 17                 |
| Val                  | 44                                        | 43                | 49                           | 34                          | 41                 |
| Subtotal             | 850                                       | 830               | 848                          | 760                         | 663                |
| Pseudo <sup>a)</sup> | 148                                       | 72                | 207                          | 80                          | 12                 |
| SeC <sup>a)</sup>    | 1                                         | 0                 | 1                            | 12                          | 1                  |
| Sup <sup>a)</sup>    | 3                                         | 4                 | 10                           | 0                           | 1                  |
| Undet <sup>a)</sup>  | 5                                         | 3                 | 8                            | 6                           | 4                  |
| Total                | 1007                                      | 909               | 1074                         | 858                         | 681                |
| <b>rRNA</b>          |                                           |                   |                              |                             |                    |
| Encode gene          | <i>Trifolium subterraneum</i> (TSUd_r1.1) | Red clover (v2.1) | <i>M. truncatula</i> (4.0v1) | <i>L. japonicus</i> (Lj3.0) | Common bean (v1.0) |
| 5.8S rRNA            | 5                                         | 6                 | 24                           | 6                           | 8                  |
| 18S rRNA             | 37                                        | 28                | 40                           | 27                          | 48                 |
| 25S rRNA             | 50                                        | 48                | 87                           | 63                          | 83                 |
| Total                | 92                                        | 82                | 151                          | 96                          | 139                |

<sup>a)</sup> Pseudo, SeC, Sup, and Undet represent pseudogenes, selenocysteine tRNAs, possible suppressor tRNAs, and tRNAs with undetermined/unknown isotypes, respectively.

<sup>b)</sup> Accession numbers used for identification of 5.8S, 18S, and 25S rRNAs were X52320.1, X16077.1, and X52320.1, respectively.

**Supplementary Table S10.** Number of putative genes encoding enzymes those mapped on KEGG pathways categorized as '1. Metabolism'

| Pathway category                        | Pathway name                                | Subterranean clover (TSUd_r1.1) | Red clover (v2.1) | <i>Medicago truncatula</i> (4.0v1) | <i>Lotus japonicus</i> (Lj3.0) | Common bean (v1.0) | Map#     |
|-----------------------------------------|---------------------------------------------|---------------------------------|-------------------|------------------------------------|--------------------------------|--------------------|----------|
| 1.1 Carbohydrate metabolism             | Glycolysis / Gluconeogenesis                | 31                              | 30                | 31                                 | 30                             | 31                 | map00010 |
|                                         | Citrate cycle (TCA cycle)                   | 20                              | 20                | 20                                 | 20                             | 19                 | map00020 |
|                                         | Pentose phosphate pathway                   | 18                              | 19                | 19                                 | 17                             | 18                 | map00030 |
|                                         | Pentose and glucuronate interconversions    | 16                              | 14                | 15                                 | 14                             | 16                 | map00040 |
|                                         | Fructose and mannose metabolism             | 20                              | 20                | 21                                 | 16                             | 20                 | map00051 |
|                                         | Galactose metabolism                        | 20                              | 18                | 19                                 | 20                             | 19                 | map00052 |
|                                         | Ascorbate and aldarate metabolism           | 15                              | 12                | 16                                 | 15                             | 15                 | map00053 |
|                                         | Starch and sucrose metabolism               | 37                              | 35                | 35                                 | 37                             | 35                 | map00500 |
|                                         | Amino sugar and nucleotide sugar metabolism | 40                              | 37                | 41                                 | 38                             | 39                 | map00520 |
|                                         | Pyruvate metabolism                         | 30                              | 28                | 33                                 | 29                             | 30                 | map00620 |
|                                         | Glyoxylate and dicarboxylate metabolism     | 25                              | 26                | 27                                 | 25                             | 27                 | map00630 |
|                                         | Propanoate metabolism                       | 14                              | 15                | 16                                 | 14                             | 15                 | map00640 |
|                                         | Butanoate metabolism                        | 12                              | 12                | 15                                 | 13                             | 13                 | map00650 |
|                                         | C5-Branched dibasic acid metabolism         | 5                               | 5                 | 5                                  | 5                              | 5                  | map00660 |
| Inositol phosphate metabolism           | 23                                          | 22                              | 23                | 21                                 | 23                             | map00562           |          |
| 1.2 Energy metabolism                   | Oxidative phosphorylation                   | 67                              | 72                | 88                                 | 73                             | 77                 | map00190 |
|                                         | Photosynthesis                              | 26                              | 28                | 48                                 | 38                             | 39                 | map00195 |
|                                         | Photosynthesis - antenna proteins           | 9                               | 11                | 12                                 | 8                              | 12                 | map00196 |
|                                         | Carbon fixation in photosynthetic organisms | 23                              | 24                | 26                                 | 23                             | 25                 | map00710 |
|                                         | Carbon fixation pathways in prokaryotes     | 15                              | 15                | 14                                 | 14                             | 14                 | map00720 |
|                                         | Methane metabolism                          | 19                              | 19                | 19                                 | 19                             | 19                 | map00680 |
|                                         | Nitrogen metabolism                         | 10                              | 12                | 12                                 | 12                             | 12                 | map00910 |
|                                         | Sulfur metabolism                           | 14                              | 14                | 14                                 | 14                             | 14                 | map00920 |
| 1.3 Lipid metabolism                    | Fatty acid biosynthesis                     | 16                              | 16                | 16                                 | 14                             | 16                 | map00061 |
|                                         | Fatty acid elongation                       | 9                               | 9                 | 9                                  | 9                              | 10                 | map00062 |
|                                         | Fatty acid degradation                      | 12                              | 11                | 13                                 | 12                             | 12                 | map00071 |
|                                         | Synthesis and degradation of ketone bodies  | 3                               | 3                 | 3                                  | 3                              | 3                  | map00072 |
|                                         | Cutin, suberine and wax biosynthesis        | 10                              | 11                | 11                                 | 11                             | 11                 | map00073 |
|                                         | Steroid biosynthesis                        | 15                              | 17                | 17                                 | 17                             | 17                 | map00100 |
|                                         | Primary bile acid biosynthesis              | 0                               | 0                 | 0                                  | 0                              | 0                  | map00120 |
|                                         | Secondary bile acid biosynthesis            | 0                               | 0                 | 0                                  | 0                              | 0                  | map00121 |
|                                         | Steroid hormone biosynthesis                | 6                               | 7                 | 7                                  | 6                              | 6                  | map00140 |
|                                         | Glycerolipid metabolism                     | 26                              | 28                | 29                                 | 29                             | 29                 | map00561 |
|                                         | Glycerophospholipid metabolism              | 36                              | 42                | 42                                 | 39                             | 43                 | map00564 |
|                                         | Ether lipid metabolism                      | 11                              | 11                | 11                                 | 11                             | 11                 | map00565 |
|                                         | Sphingolipid metabolism                     | 18                              | 17                | 19                                 | 17                             | 18                 | map00600 |
|                                         | Arachidonic acid metabolism                 | 10                              | 9                 | 10                                 | 10                             | 9                  | map00590 |
| Linoleic acid metabolism                | 6                                           | 6                               | 6                 | 6                                  | 6                              | map00591           |          |
| alpha-Linolenic acid metabolism         | 16                                          | 15                              | 16                | 14                                 | 16                             | map00592           |          |
| Biosynthesis of unsaturated fatty acids | 1                                           | 1                               | 1                 | 0                                  | 1                              | map01040           |          |
| 1.4 Nucleotide metabolism               | Purine metabolism                           | 81                              | 90                | 98                                 | 82                             | 97                 | map00230 |
|                                         | Pyrimidine metabolism                       | 69                              | 73                | 80                                 | 67                             | 78                 | map00240 |

|                                                     |                                                            |    |    |    |    |          |          |
|-----------------------------------------------------|------------------------------------------------------------|----|----|----|----|----------|----------|
| 1.5 Amino acid metabolism                           | Alanine, aspartate and glutamate metabolism                | 24 | 26 | 28 | 28 | 28       | map00250 |
|                                                     | Glycine, serine and threonine metabolism                   | 35 | 34 | 38 | 36 | 37       | map00260 |
|                                                     | Cysteine and methionine metabolism                         | 34 | 34 | 36 | 34 | 36       | map00270 |
|                                                     | Valine, leucine and isoleucine degradation                 | 21 | 20 | 21 | 21 | 21       | map00280 |
|                                                     | Valine, leucine and isoleucine biosynthesis                | 10 | 10 | 10 | 10 | 10       | map00290 |
|                                                     | Lysine biosynthesis                                        | 11 | 10 | 11 | 10 | 10       | map00300 |
|                                                     | Lysine degradation                                         | 14 | 12 | 13 | 13 | 14       | map00310 |
|                                                     | Arginine and proline metabolism                            | 40 | 36 | 42 | 39 | 41       | map00330 |
|                                                     | Histidine metabolism                                       | 10 | 10 | 13 | 12 | 12       | map00340 |
|                                                     | Tyrosine metabolism                                        | 19 | 17 | 20 | 22 | 20       | map00350 |
|                                                     | Phenylalanine metabolism                                   | 20 | 16 | 22 | 20 | 19       | map00360 |
|                                                     | Tryptophan metabolism                                      | 12 | 12 | 14 | 12 | 13       | map00380 |
|                                                     | Phenylalanine, tyrosine and tryptophan biosynthesis        | 24 | 23 | 25 | 24 | 25       | map00400 |
| 1.6 Metabolism of other amino acids                 | beta-Alanine metabolism                                    | 16 | 16 | 17 | 17 | 17       | map00410 |
|                                                     | Taurine and hypotaurine metabolism                         | 3  | 3  | 3  | 3  | 3        | map00430 |
|                                                     | Phosphonate and phosphinate metabolism                     | 4  | 4  | 4  | 4  | 4        | map00440 |
|                                                     | Selenocompound metabolism                                  | 10 | 10 | 10 | 9  | 10       | map00450 |
|                                                     | Cyanoamino acid metabolism                                 | 12 | 12 | 13 | 12 | 11       | map00460 |
|                                                     | D-Glutamine and D-glutamate metabolism                     | 1  | 1  | 1  | 1  | 1        | map00471 |
|                                                     | D-Arginine and D-ornithine metabolism                      | 0  | 0  | 1  | 1  | 1        | map00472 |
|                                                     | D-Alanine metabolism                                       | 0  | 0  | 1  | 1  | 0        | map00473 |
|                                                     | Glutathione metabolism                                     | 16 | 17 | 17 | 16 | 17       | map00480 |
| 1.7 Glycan biosynthesis and metabolism              | N-Glycan biosynthesis                                      | 31 | 31 | 32 | 25 | 31       | map00510 |
|                                                     | Various types of N-glycan biosynthesis                     | 9  | 8  | 9  | 6  | 8        | map00513 |
|                                                     | Mucin type O-Glycan biosynthesis                           | 1  | 1  | 1  | 1  | 1        | map00512 |
|                                                     | Other types of O-glycan biosynthesis                       | 0  | 0  | 0  | 0  | 0        | map00514 |
|                                                     | Glycosaminoglycan biosynthesis - CS/DS                     | 2  | 2  | 2  | 2  | 2        | map00532 |
|                                                     | Glycosaminoglycan biosynthesis - HS/Hep                    | 3  | 2  | 3  | 3  | 3        | map00534 |
|                                                     | Glycosaminoglycan biosynthesis - KS                        | 0  | 0  | 0  | 0  | 0        | map00533 |
|                                                     | Glycosaminoglycan degradation                              | 5  | 5  | 5  | 5  | 5        | map00531 |
|                                                     | Glycosylphosphatidylinositol(GPI)-anchor biosynthesis      | 18 | 20 | 21 | 16 | 22       | map00563 |
|                                                     | Glycosphingolipid biosynthesis - lacto and neolacto series | 0  | 0  | 0  | 0  | 0        | map00601 |
|                                                     | Glycosphingolipid biosynthesis - globo series              | 4  | 4  | 4  | 4  | 4        | map00603 |
|                                                     | Glycosphingolipid biosynthesis - ganglio series            | 3  | 3  | 3  | 3  | 3        | map00604 |
|                                                     | Lipopolysaccharide biosynthesis                            | 8  | 8  | 8  | 8  | 8        | map00540 |
|                                                     | Peptidoglycan biosynthesis                                 | 2  | 2  | 3  | 4  | 2        | map00550 |
| Other glycan degradation                            | 0                                                          | 0  | 0  | 0  | 0  | map00511 |          |
| 1.8 Metabolism of cofactors and vitamins            | Thiamine metabolism                                        | 10 | 8  | 9  | 9  | 10       | map00730 |
|                                                     | Riboflavin metabolism                                      | 8  | 10 | 10 | 11 | 10       | map00740 |
|                                                     | Vitamin B6 metabolism                                      | 8  | 8  | 7  | 8  | 8        | map00750 |
|                                                     | Nicotinate and nicotinamide metabolism                     | 13 | 12 | 13 | 11 | 13       | map00760 |
|                                                     | Pantothenate and CoA biosynthesis                          | 17 | 17 | 17 | 17 | 17       | map00770 |
|                                                     | Biotin metabolism                                          | 7  | 8  | 8  | 7  | 8        | map00780 |
|                                                     | Lipoic acid metabolism                                     | 3  | 3  | 3  | 3  | 3        | map00785 |
|                                                     | Folate biosynthesis                                        | 11 | 10 | 11 | 11 | 11       | map00790 |
|                                                     | One carbon pool by folate                                  | 13 | 14 | 13 | 13 | 12       | map00670 |
|                                                     | Retinol metabolism                                         | 9  | 9  | 9  | 9  | 9        | map00830 |
|                                                     | Porphyrin and chlorophyll metabolism                       | 30 | 31 | 30 | 29 | 31       | map00860 |
| Ubiquinone and other terpenoid-quinone biosynthesis | 19                                                         | 17 | 20 | 18 | 19 | map00130 |          |

|                                                  |                                                        |    |    |    |    |          |          |
|--------------------------------------------------|--------------------------------------------------------|----|----|----|----|----------|----------|
| 1.9 Metabolism of terpenoids and polyketides     | Terpenoid backbone biosynthesis                        | 27 | 29 | 30 | 26 | 30       | map00900 |
|                                                  | Monoterpenoid biosynthesis                             | 3  | 5  | 5  | 5  | 6        | map00902 |
|                                                  | Sesquiterpenoid and triterpenoid biosynthesis          | 6  | 8  | 9  | 8  | 8        | map00909 |
|                                                  | Diterpenoid biosynthesis                               | 11 | 12 | 13 | 11 | 12       | map00904 |
|                                                  | Carotenoid biosynthesis                                | 23 | 22 | 23 | 21 | 23       | map00906 |
|                                                  | Brassinosteroid biosynthesis                           | 4  | 8  | 8  | 7  | 8        | map00905 |
|                                                  | Insect hormone biosynthesis                            | 1  | 1  | 1  | 1  | 1        | map00981 |
|                                                  | Zeatin biosynthesis                                    | 6  | 6  | 6  | 6  | 7        | map00908 |
|                                                  | Limonene and pinene degradation                        | 4  | 4  | 4  | 4  | 4        | map00903 |
|                                                  | Geraniol degradation                                   | 2  | 2  | 3  | 2  | 2        | map00281 |
|                                                  | Type I polyketide structures                           | 0  | 0  | 0  | 0  | 0        | map01052 |
|                                                  | Biosynthesis of 12-, 14- and 16-membered macrolides    | 0  | 0  | 0  | 0  | 0        | map00522 |
|                                                  | Biosynthesis of ansamycins                             | 1  | 1  | 1  | 1  | 1        | map01051 |
|                                                  | Biosynthesis of type II polyketide backbone            | 0  | 0  | 0  | 0  | 0        | map01056 |
|                                                  | Biosynthesis of type II polyketide products            | 0  | 0  | 0  | 0  | 0        | map01057 |
|                                                  | Tetracycline biosynthesis                              | 4  | 4  | 4  | 3  | 4        | map00253 |
|                                                  | Polyketide sugar unit biosynthesis                     | 4  | 4  | 3  | 2  | 3        | map00523 |
|                                                  | Nonribosomal peptide structures                        | 0  | 0  | 0  | 0  | 0        | map01054 |
|                                                  | Biosynthesis of siderophore group nonribosomal peptide | 2  | 1  | 1  | 2  | 2        | map01053 |
|                                                  | Biosynthesis of vancomycin group antibiotics           | 1  | 1  | 1  | 1  | 1        | map01055 |
| 1.10 Biosynthesis of other secondary metabolites | Phenylpropanoid biosynthesis                           | 17 | 21 | 21 | 20 | 21       | map00940 |
|                                                  | Stilbenoid, diarylheptanoid and gingerol biosynthesis  | 6  | 7  | 6  | 7  | 7        | map00945 |
|                                                  | Flavonoid biosynthesis                                 | 14 | 17 | 16 | 17 | 17       | map00941 |
|                                                  | Flavone and flavonol biosynthesis                      | 2  | 5  | 6  | 4  | 5        | map00944 |
|                                                  | Anthocyanin biosynthesis                               | 5  | 5  | 6  | 6  | 7        | map00942 |
|                                                  | Isoflavonoid biosynthesis                              | 11 | 11 | 11 | 11 | 11       | map00943 |
|                                                  | Indole alkaloid biosynthesis                           | 3  | 3  | 3  | 2  | 3        | map00901 |
|                                                  | Isoquinoline alkaloid biosynthesis                     | 10 | 10 | 13 | 14 | 12       | map00950 |
|                                                  | Tropane, piperidine and pyridine alkaloid biosynthesis | 12 | 9  | 12 | 13 | 12       | map00960 |
|                                                  | Acridone alkaloid biosynthesis                         | 0  | 0  | 0  | 0  | 0        | map01058 |
|                                                  | Caffeine metabolism                                    | 2  | 2  | 2  | 2  | 2        | map00232 |
|                                                  | Betalain biosynthesis                                  | 4  | 3  | 3  | 5  | 4        | map00965 |
|                                                  | Glucosinolate biosynthesis                             | 0  | 0  | 0  | 0  | 0        | map00966 |
|                                                  | Benzoxazinoid biosynthesis                             | 0  | 0  | 0  | 0  | 0        | map00402 |
|                                                  | Penicillin and cephalosporin biosynthesis              | 1  | 1  | 3  | 3  | 2        | map00311 |
|                                                  | Carbapenem biosynthesis                                | 0  | 0  | 0  | 0  | 0        | map00332 |
|                                                  | Monobactam biosynthesis                                | 0  | 0  | 0  | 0  | 0        | map00261 |
|                                                  | Clavulanic acid biosynthesis                           | 0  | 0  | 0  | 0  | 0        | map00331 |
|                                                  | Streptomycin biosynthesis                              | 7  | 7  | 7  | 6  | 6        | map00521 |
|                                                  | Butirosin and neomycin biosynthesis                    | 1  | 1  | 1  | 1  | 1        | map00524 |
| Puromycin biosynthesis                           | 0                                                      | 0  | 0  | 0  | 0  | map00231 |          |
| Novobiocin biosynthesis                          | 3                                                      | 2  | 3  | 3  | 3  | map00401 |          |
| Aflatoxin biosynthesis                           | 1                                                      | 1  | 1  | 1  | 1  | map00254 |          |

|                                                |                                                 |    |    |    |    |    |          |
|------------------------------------------------|-------------------------------------------------|----|----|----|----|----|----------|
| 1.11 Xenobiotics biodegradation and metabolism | Benzoate degradation                            | 6  | 4  | 7  | 6  | 7  | map00362 |
|                                                | Aminobenzoate degradation                       | 7  | 8  | 9  | 8  | 7  | map00627 |
|                                                | Fluorobenzoate degradation                      | 1  | 1  | 2  | 1  | 2  | map00364 |
|                                                | Chloroalkane and chloroalkene degradation       | 6  | 6  | 6  | 6  | 6  | map00625 |
|                                                | Chlorocyclohexane and chlorobenzene degradation | 4  | 4  | 5  | 4  | 5  | map00361 |
|                                                | Toluene degradation                             | 1  | 1  | 3  | 1  | 2  | map00623 |
|                                                | Xylene degradation                              | 1  | 0  | 2  | 1  | 1  | map00622 |
|                                                | Nitrotoluene degradation                        | 0  | 0  | 0  | 0  | 0  | map00633 |
|                                                | Ethylbenzene degradation                        | 1  | 1  | 2  | 1  | 1  | map00642 |
|                                                | Styrene degradation                             | 5  | 4  | 5  | 5  | 5  | map00643 |
|                                                | Atrazine degradation                            | 0  | 0  | 1  | 0  | 0  | map00791 |
|                                                | Caprolactam degradation                         | 1  | 1  | 1  | 1  | 1  | map00930 |
|                                                | DDT degradation                                 | 1  | 1  | 1  | 1  | 1  | map00351 |
|                                                | Bisphenol degradation                           | 3  | 3  | 3  | 3  | 3  | map00363 |
|                                                | Dioxin degradation                              | 1  | 1  | 2  | 1  | 1  | map00621 |
|                                                | Naphthalene degradation                         | 3  | 3  | 3  | 3  | 3  | map00626 |
|                                                | Polycyclic aromatic hydrocarbon degradation     | 3  | 3  | 3  | 3  | 3  | map00624 |
|                                                | Furfural degradation                            | 0  | 0  | 0  | 0  | 0  | map00365 |
|                                                | Steroid degradation                             | 0  | 0  | 0  | 0  | 0  | map00984 |
|                                                | Metabolism of xenobiotics by cytochrome P450    | 6  | 6  | 6  | 7  | 6  | map00980 |
|                                                | Drug metabolism - cytochrome P450               | 4  | 4  | 5  | 4  | 4  | map00982 |
|                                                | Drug metabolism - other enzymes                 | 12 | 12 | 12 | 12 | 12 | map00983 |

**Supplementary Table S11** Numbers of annotated SNPs by SnpEff program

| Impact on gene function | Annotation                                    | No. of SNPs | %     |
|-------------------------|-----------------------------------------------|-------------|-------|
| High impact             | Splice acceptor variant & intron variant      | 11          | 0.03  |
| High impact             | Splice donor variant & intron variant         | 26          | 0.07  |
| High impact             | Start lost                                    | 15          | 0.04  |
| High impact             | Start lost & splice region variant            | 1           | 0     |
| High impact             | Stop gained                                   | 130         | 0.35  |
| High impact             | Stop gained & splice region variant           | 2           | 0.01  |
| High impact             | Stop lost                                     | 79          | 0.22  |
| High impact             | Stop lost & splice region variant             | 23          | 0.06  |
| Moderate impact         | Missense variant                              | 4,840       | 13.18 |
| Moderate impact         | Missense variant & splice region variant      | 54          | 0.15  |
| Modifier impact         | Intergenic region                             | 15,589      | 42.45 |
| Modifier impact         | Intron variant                                | 10,518      | 28.64 |
| Low impact              | Initiator codon variant                       | 1           | 0     |
| Low impact              | Splice region variant & intron variant        | 411         | 1.12  |
| Low impact              | Splice region variant & stop retained variant | 6           | 0.02  |
| Low impact              | Splice region variant & synonymous variant    | 46          | 0.13  |
| Low impact              | Stop retained variant                         | 15          | 0.04  |
| Low impact              | Synonymous variant                            | 4,956       | 13.5  |
